# Supplementary material for: Synthesis and properties of 5,6-dihydrodipyrrolo[1,2-d;2′,1′-g][1,4]diazepin-11-one
Source: Royal Society of Chemistry journal article supplement (doi:10.1039/b906802n), 2009-01-01

## Supporting Information

### Synthesis and properties of 5,6-dihydro-dipyrrolo[1,2-*d*;1',2'-*g*][1,4]diazepin-11-one.

Karen A. Johnston<sup>a</sup> and Hamish McNab,<sup>\*a</sup>

*School of Chemistry, The University of Edinburgh, West Mains Road, Edinburgh EH9 3JJ  
UK.*

|                                                                                                                                                          | Page |
|----------------------------------------------------------------------------------------------------------------------------------------------------------|------|
| Synthesis of 1,2-di(pyrrol-1-yl)ethane <b>4</b>                                                                                                          | 2    |
| Synthesis of 1,1-di(pyrrol-1-yl)methane <b>5</b>                                                                                                         | 2    |
| X-Ray crystal structure tables for <b>2</b>                                                                                                              | 3    |
| Gas-phase structure of <b>2</b> calculated at MP2 level using the 6-31G basis set.                                                                       | 8    |
| X-Ray crystal structure tables for <b>3</b>                                                                                                              | 9    |
| Gas-phase structure of <b>3</b> calculated at MP2 level using the 6-31G basis set.                                                                       | 16   |
| Comparison of X-Ray structures (bond lengths/Å and bond angles/°) of<br><b>2</b> and <b>3</b> and corresponding data from <i>ab initio</i> calculations. | 17   |
| Gas-phase structure of <b>7</b> calculated at MP2 level using the 6-31G basis set.                                                                       | 18   |
| X-Ray crystal structure tables for <b>8</b>                                                                                                              | 19   |
| Gas-phase structure of <b>8</b> calculated at MP2 level using the 6-31G basis set.                                                                       | 24   |
| References                                                                                                                                               | 25   |
| NMR spectra of <b>4</b> , <b>2</b> , <b>5</b> , <b>3</b> , <b>6</b> , <b>7</b> , <b>8</b> , <b>9</b> , <b>10</b>                                         | 26   |

### 1,2-Di(pyrrol-1-yl)ethane **4**<sup>1</sup>

Using the method of ref. 3, pyrrole (0.90 cm<sup>3</sup>, 13.0 mmol) was added to a stirred suspension of powdered potassium hydroxide (2.90 g, 51.7 mmol, 3.98 equiv.) in DMSO (40 cm<sup>3</sup>) and the mixture was stirred at room temperature for 3 h. The solution was then heated to 65 °C and ethane-1,2-ditosylate (7.20 g, 19.5 mmol, 1.50 equiv.) added in 6 aliquots over the course of 60 min. The mixture was kept at 65 °C for a further 5 h. Workup and purification by Kugelrohr distillation [50-70 °C (1.5 Torr)] yielded 1,2-di(pyrrol-1-yl)ethane **4** as an off white solid (0.56 g, 54%) mp 107-109 °C (from ether); (lit.,<sup>1</sup> 107-108 °C) (Found: C, 74.95; H, 7.75; N, 17.45. C<sub>10</sub>H<sub>12</sub>N<sub>2</sub> requires C, 74.95; H, 7.55; N, 17.5%);  $\delta_{\text{H}}$  6.46-6.45 (4H, m), 6.14-6.12 (4H, m) and 4.18 (4H, s);  $\delta_{\text{C}}$  120.41 (4 CH), 108.56 (4 CH) and 50.82 (2 CH<sub>2</sub>); *m/z* 160 (M<sup>+</sup>, 8%), 80 (86), 53 (100) and 39 (93).

### 1,2-Di(pyrrol-1-yl)methane **5**<sup>1</sup>

Pyrrole (9.00 cm<sup>3</sup>, 130 mmol) was added to a stirred suspension of powdered potassium hydroxide (24.02 g, 0.43 mol, 3.31 equiv.) in DMSO (200 cm<sup>3</sup>) at room temperature. After 1 h, the mixture was heated to 40 °C and DCM (6.32 cm<sup>3</sup>, 98.6 mmol, 0.76 equiv.) was added slowly. The solution was heated at 40 °C for a further 4 h. Once cool, ether (100 cm<sup>3</sup>) and water (200 cm<sup>3</sup>) were added and the layers separated. The aqueous layer was extracted with ether (4 × 50 cm<sup>3</sup>), the combined organic extracts were washed with water (2 × 40 cm<sup>3</sup>), brine (2 × 40 cm<sup>3</sup>), dried (MgSO<sub>4</sub>) and the solvent removed under reduced pressure to afford a pale yellow solid. Recrystallisation from chloroform gave 1,2-di(pyrrol-1-yl)methane **5** (6.85 g, 72%) mp 99-101 °C (from chloroform); (lit.,<sup>1</sup> 105 °C) (Found: C, 73.8; H, 6.9; N, 19.15. C<sub>9</sub>H<sub>10</sub>N<sub>2</sub> requires C, 73.95; H, 6.9; N, 19.15%);  $\delta_{\text{H}}$  6.77 (4H, t, *J* 2.1), 6.22 (4H, t, *J* 2.1) and 5.81 (2H, s, CH<sub>2</sub>);  $\delta_{\text{C}}$  119.99 (4 × CH), 109.51 (4 × CH) and 61.56 (CH<sub>2</sub>); *m/z* 146 (M<sup>+</sup>, 35%), 80 (100), 53 (61) and 39 (43).

**Table 1. Crystal data and structure refinement for 2 (HM7003).**

Contact Anna Collins, [anna.collins@ed.ac.uk](mailto:anna.collins@ed.ac.uk)

#### A. CRYSTAL DATA

|                                |                                                                                                         |
|--------------------------------|---------------------------------------------------------------------------------------------------------|
| Empirical formula              | C <sub>11</sub> H <sub>12</sub> N <sub>2</sub> O <sub>2</sub>                                           |
|                                | C <sub>11</sub> H <sub>10</sub> N <sub>2</sub> O <sub>1</sub> , (H <sub>2</sub> O)                      |
| Formula weight                 | 204.23                                                                                                  |
| Wavelength                     | 0.71073 Å                                                                                               |
| Temperature                    | 150 K                                                                                                   |
| Crystal system                 | Orthorhombic                                                                                            |
| Space group                    | P 21 21 21                                                                                              |
| Unit cell dimensions           | a = 4.5748(3) Å alpha = 90 deg.<br>b = 13.0074(9) Å beta = 90 deg.<br>c = 17.0717(12) Å gamma = 90 deg. |
| Volume                         | 1015.87(12) Å <sup>3</sup>                                                                              |
| Number of reflections for cell | 2777 (3 < theta < 31 deg.)                                                                              |
| Z                              | 4                                                                                                       |
| Density (calculated)           | 1.335 Mg/m <sup>3</sup>                                                                                 |
| Absorption coefficient         | 0.094 mm <sup>-1</sup>                                                                                  |
| F(000)                         | 432                                                                                                     |

#### B. DATA COLLECTION

|                                 |                                                                                       |
|---------------------------------|---------------------------------------------------------------------------------------|
| Crystal description             | pale yellow block                                                                     |
| Crystal size                    | 0.32 x 0.21 x 0.17 mm                                                                 |
| Instrument                      | Area                                                                                  |
| Theta range for data collection | 1.968 to 30.521 deg.                                                                  |
| Index ranges                    | -6 ≤ h ≤ 6, -15 ≤ k ≤ 17, -23 ≤ l ≤ 24                                                |
| Reflections collected           | 7851                                                                                  |
| Independent reflections         | 1750 [R(int) = 0.043]                                                                 |
| Scan type                       | \w                                                                                    |
| Absorption correction           | Semi-empirical from equivalents<br>(T <sub>min</sub> = 0.81, T <sub>max</sub> = 0.98) |

#### C. SOLUTION AND REFINEMENT.

|                                   |                                             |
|-----------------------------------|---------------------------------------------|
| Solution                          | direct (SIR92 (Altomare et al., 1994))      |
| Refinement type                   | Full-matrix least-squares on F <sup>2</sup> |
| Program used for refinement       | CRYSTALS                                    |
| Hydrogen atom placement           | geom                                        |
| Hydrogen atom treatment           | constr                                      |
| Data                              | 1742                                        |
| Restraints                        | 0                                           |
| Parameters                        | 136                                         |
| Goodness-of-fit on F <sup>2</sup> | 1.0260                                      |
| Conventional R [F > 4σ(F)]        | R <sub>1</sub> = 0.0703 [1426 data]         |
| R <sub>w</sub>                    | 0.1841                                      |
| Final maximum delta/sigma         | 0.000180                                    |

Weighting scheme                      Sheldrick Weights  
Largest diff. peak and hole        0.77 and -0.34 e.A<sup>-3</sup>

**Table 2. Atomic coordinates ( x 10<sup>4</sup>) and equivalent isotropic displacement parameters (A<sup>2</sup> x 10<sup>3</sup>) for 2 (hm7003). U(eq) is defined as one third of the trace of the orthogonalized U<sub>ij</sub> tensor.**

|       | x         | y       | z       | U(eq) |
|-------|-----------|---------|---------|-------|
| C(1)  | 5851(9)   | 6862(3) | 8631(2) | 33    |
| C(2)  | 6116(10)  | 6597(3) | 9424(2) | 39    |
| C(3)  | 4374(9)   | 5756(3) | 9550(2) | 34    |
| N(4)  | 3045(7)   | 5489(2) | 8872(2) | 27    |
| C(5)  | 1020(9)   | 4627(3) | 8811(2) | 30    |
| C(6)  | 1573(9)   | 3999(2) | 8078(2) | 30    |
| N(7)  | 320(7)    | 4506(2) | 7393(2) | 28    |
| C(8)  | -1640(9)  | 4059(3) | 6909(2) | 34    |
| C(9)  | -2389(10) | 4751(3) | 6331(2) | 39    |
| C(10) | -784(9)   | 5635(3) | 6464(2) | 35    |
| C(11) | 2827(8)   | 6236(2) | 7488(2) | 26    |
| C(12) | 906(8)    | 5488(3) | 7132(2) | 27    |
| C(13) | 3902(8)   | 6171(2) | 8288(2) | 26    |
| O(1)  | 3547(7)   | 7013(2) | 7101(1) | 36    |
| O(15) | 751(10)   | 2385(5) | 514(2)  | 136   |

**Table 3. Bond lengths [Å] and angles [deg] for 2 (hm7003).**

---

|                  |          |
|------------------|----------|
| C(1)-C(2)        | 1.401(5) |
| C(1)-C(13)       | 1.395(5) |
| C(1)-H(11)       | 0.932    |
| C(2)-C(3)        | 1.370(6) |
| C(2)-H(21)       | 0.942    |
| C(3)-N(4)        | 1.354(4) |
| C(3)-H(31)       | 0.939    |
| N(4)-C(5)        | 1.459(4) |
| N(4)-C(13)       | 1.390(4) |
| C(5)-C(6)        | 1.516(5) |
| C(5)-H(51)       | 0.967    |
| C(5)-H(52)       | 0.970    |
| C(6)-N(7)        | 1.460(4) |
| C(6)-H(61)       | 0.975    |
| C(6)-H(62)       | 0.973    |
| N(7)-C(8)        | 1.351(5) |
| N(7)-C(12)       | 1.379(4) |
| C(8)-C(9)        | 1.379(5) |
| C(8)-H(81)       | 0.948    |
| C(9)-C(10)       | 1.383(5) |
| C(9)-H(91)       | 0.948    |
| C(10)-C(12)      | 1.391(5) |
| C(10)-H(101)     | 0.936    |
| C(11)-C(12)      | 1.445(5) |
| C(11)-C(13)      | 1.455(4) |
| C(11)-O(1)       | 1.251(4) |
| O(15)-H(151)     | 0.820    |
| O(15)-H(152)     | 0.820    |
|                  |          |
| C(2)-C(1)-C(13)  | 107.6(3) |
| C(2)-C(1)-H(11)  | 127.5    |
| C(13)-C(1)-H(11) | 124.9    |
| C(1)-C(2)-C(3)   | 107.3(3) |
| C(1)-C(2)-H(21)  | 126.0    |
| C(3)-C(2)-H(21)  | 126.6    |
| C(2)-C(3)-N(4)   | 109.4(3) |
| C(2)-C(3)-H(31)  | 127.8    |
| N(4)-C(3)-H(31)  | 122.9    |
| C(3)-N(4)-C(5)   | 122.9(3) |
| C(3)-N(4)-C(13)  | 108.8(3) |
| C(5)-N(4)-C(13)  | 128.2(3) |
| N(4)-C(5)-C(6)   | 111.5(3) |
| N(4)-C(5)-H(51)  | 107.1    |
| C(6)-C(5)-H(51)  | 110.2    |
| N(4)-C(5)-H(52)  | 109.5    |
| C(6)-C(5)-H(52)  | 108.2    |

|                     |          |
|---------------------|----------|
| H(51)-C(5)-H(52)    | 110.4    |
| C(5)-C(6)-N(7)      | 110.6(3) |
| C(5)-C(6)-H(61)     | 109.2    |
| N(7)-C(6)-H(61)     | 109.1    |
| C(5)-C(6)-H(62)     | 110.4    |
| N(7)-C(6)-H(62)     | 107.0    |
| H(61)-C(6)-H(62)    | 110.5    |
| C(6)-N(7)-C(8)      | 123.7(3) |
| C(6)-N(7)-C(12)     | 127.0(3) |
| C(8)-N(7)-C(12)     | 109.3(3) |
| N(7)-C(8)-C(9)      | 108.7(3) |
| N(7)-C(8)-H(81)     | 125.1    |
| C(9)-C(8)-H(81)     | 126.2    |
| C(8)-C(9)-C(10)     | 107.1(3) |
| C(8)-C(9)-H(91)     | 126.9    |
| C(10)-C(9)-H(91)    | 126.0    |
| C(9)-C(10)-C(12)    | 108.4(3) |
| C(9)-C(10)-H(101)   | 126.5    |
| C(12)-C(10)-H(101)  | 125.1    |
| C(12)-C(11)-C(13)   | 124.1(3) |
| C(12)-C(11)-O(1)    | 118.9(3) |
| C(13)-C(11)-O(1)    | 116.9(3) |
| C(11)-C(12)-C(10)   | 126.2(3) |
| C(11)-C(12)-N(7)    | 127.3(3) |
| C(10)-C(12)-N(7)    | 106.5(3) |
| C(11)-C(13)-C(1)    | 125.0(3) |
| C(11)-C(13)-N(4)    | 128.0(3) |
| C(1)-C(13)-N(4)     | 106.9(3) |
| H(151)-O(15)-H(152) | 130.4    |

---

Symmetry transformations used to generate equivalent atoms:

**Table 4. Anisotropic displacement parameters ( $\text{\AA}^2 \times 10^3$ ) for 2 (hm7003).  
 The anisotropic displacement factor exponent takes the form:  
 $-2 \pi^2 [ h^2 a^{*2} U_{11} + \dots + 2 h k a^* b^* U_{12} ]$**

|       | U11   | U22    | U33   | U23    | U13    | U12    |
|-------|-------|--------|-------|--------|--------|--------|
| C(1)  | 29(2) | 25(2)  | 45(2) | -2(1)  | -6(2)  | 0(2)   |
| C(2)  | 36(2) | 41(2)  | 41(2) | -15(2) | -10(2) | 6(2)   |
| C(3)  | 34(2) | 40(2)  | 26(2) | -4(1)  | -3(2)  | 9(2)   |
| N(4)  | 24(1) | 30(1)  | 26(1) | -1(1)  | 0(1)   | 7(1)   |
| C(5)  | 29(2) | 31(2)  | 31(2) | 3(1)   | 4(2)   | 1(2)   |
| C(6)  | 29(2) | 24(1)  | 36(2) | 1(1)   | 2(2)   | 1(1)   |
| N(7)  | 26(2) | 26(1)  | 30(1) | -3(1)  | 5(1)   | -2(1)  |
| C(8)  | 30(2) | 36(2)  | 35(2) | -13(2) | 3(2)   | -3(2)  |
| C(9)  | 29(2) | 59(2)  | 30(2) | -10(2) | 1(2)   | -6(2)  |
| C(10) | 32(2) | 47(2)  | 25(1) | -1(2)  | 1(2)   | 5(2)   |
| C(11) | 25(2) | 24(1)  | 29(1) | 0(1)   | 4(1)   | 4(1)   |
| C(12) | 29(2) | 29(2)  | 23(1) | -3(1)  | 5(1)   | 5(2)   |
| C(13) | 26(2) | 23(1)  | 29(1) | 1(1)   | 1(1)   | 3(1)   |
| O(1)  | 44(2) | 29(1)  | 34(1) | 4(1)   | 3(1)   | -4(1)  |
| O(15) | 72(3) | 289(8) | 48(2) | 22(3)  | -27(2) | -99(5) |

**Table 5. Hydrogen coordinates ( $\times 10^4$ ) and isotropic displacement parameters ( $\text{\AA}^2 \times 10^3$ ) for 2 (hm7003).**

|        | x     | y    | z     | U(eq) |
|--------|-------|------|-------|-------|
| H(11)  | 6774  | 7400 | 8369  | 39    |
| H(21)  | 7292  | 6933 | 9797  | 47    |
| H(31)  | 4121  | 5389 | 10018 | 41    |
| H(51)  | 1299  | 4206 | 9272  | 36    |
| H(52)  | -970  | 4883 | 8790  | 36    |
| H(61)  | 3674  | 3921 | 8002  | 35    |
| H(62)  | 641   | 3328 | 8120  | 36    |
| H(81)  | -2410 | 3387 | 6971  | 42    |
| H(91)  | -3771 | 4652 | 5925  | 46    |
| H(101) | -840  | 6240 | 6167  | 42    |
| H(151) | 967   | 2559 | 972   | 151   |
| H(152) | -657  | 2449 | 221   | 151   |

**Table 6. Gas-phase structure of 2 calculated at MP2 level using the 6-31G basis set.<sup>2</sup>**

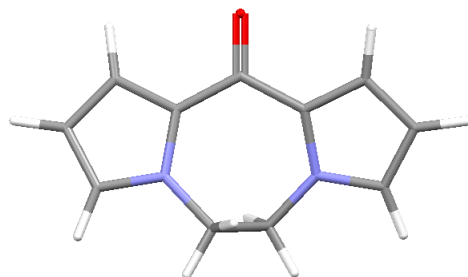

|   |           |           |           |
|---|-----------|-----------|-----------|
| C | -2.557653 | 1.212464  | -0.229177 |
| C | -1.307314 | 0.593108  | -0.011387 |
| N | -1.559346 | -0.772832 | 0.220742  |
| C | -2.936377 | -1.002744 | 0.151733  |
| C | -3.570299 | 0.215824  | -0.126766 |
| C | 0.000018  | 1.283936  | 0.000255  |
| C | -0.570778 | -1.825778 | 0.514469  |
| O | -0.000024 | 2.563952  | 0.000821  |
| C | 1.307379  | 0.593170  | 0.010902  |
| C | 2.557786  | 1.212505  | 0.228403  |
| C | 3.570356  | 0.215776  | 0.126183  |
| C | 2.936312  | -1.002862 | -0.151736 |
| N | 1.559281  | -0.772899 | -0.220618 |
| C | 0.570684  | -1.825921 | -0.514000 |
| H | -2.683608 | 2.269530  | -0.436673 |
| H | -3.340043 | -1.998118 | 0.307403  |
| H | -4.638678 | 0.358432  | -0.250712 |
| H | -1.108789 | -2.782989 | 0.474688  |
| H | -0.159705 | -1.700705 | 1.526987  |
| H | 2.683827  | 2.269646  | 0.435464  |
| H | 4.638775  | 0.358390  | 0.249765  |
| H | 3.339901  | -1.998308 | -0.307144 |
| H | 0.159594  | -1.701138 | -1.526546 |
| H | 1.108699  | -2.783118 | -0.473954 |



**Table 7. Crystal data and structure refinement for 3 (hm7004).**

Contact Fraser J. White, f.j.white@sms.ed.ac.uk

**A. CRYSTAL DATA**

Empirical formula C<sub>10</sub> H<sub>8</sub> N<sub>2</sub> O  
C<sub>10</sub> H<sub>8</sub> N<sub>2</sub> O

Formula weight 172.18  
Wavelength 0.71073 Å  
Temperature 150(2) K  
Crystal system Triclinic  
Space group P -1  
Unit cell dimensions a = 7.6509(2) Å alpha = 102.228(2) deg.  
b = 9.1569(3) Å beta = 93.332(2) deg.  
c = 12.0975(4) Å gamma = 99.815(2) deg.  
Volume 812.26(4) Å<sup>3</sup>  
Number of reflections for cell ? (? < theta < ? deg.)  
Z 4  
Density (calculated) 1.408 Mg/m<sup>3</sup>  
Absorption coefficient 0.094 mm<sup>-1</sup>  
F(000) 360

**B. DATA COLLECTION**

Crystal description orange block  
Crystal size 0.28 x 0.25 x 0.13 mm  
Instrument Bruker Smart Apex CCD  
Theta range for data collection 1.73 to 30.53 deg.  
Index ranges -10 ≤ h ≤ 10, -12 ≤ k ≤ 12, -16 ≤ l ≤ 17  
Reflections collected 11866  
Independent reflections 4583 [R(int) = 0.0416]  
Scan type Omega Scans  
Absorption correction Semi-empirical from equivalents  
(T<sub>min</sub> = 0.8167, T<sub>max</sub> = 0.9849)

**C. SOLUTION AND REFINEMENT.**

Solution direct (Shelxs Sheldrick)  
Refinement type Full-matrix least-squares on F<sup>2</sup>  
Program used for refinement SHELXL-97  
Hydrogen atom placement geom  
Hydrogen atom treatment constr  
Data / restraints / parameters 4583/ 0/ 235  
Goodness-of-fit on F<sup>2</sup> 1.026  
Conventional R [F > 4σ(F)] R<sub>1</sub> = 0.0597 [3122 data]  
R<sub>w</sub> 0.1396  
Final maximum delta/sigma 0.000  
Weighting scheme

calc  $w=1/[\sqrt{s^2(F_o^2)+(0.0520P)^2+0.2206P}]$  where  $P=(F_o^2+2F_c^2)/3$   
 Largest diff. peak and hole 0.281 and -0.220 e.Å<sup>-3</sup>

**Table 8. Atomic coordinates ( x 10<sup>4</sup>) and equivalent isotropic displacement parameters (Å<sup>2</sup> x 10<sup>3</sup>) for 3 (hm7004). U(eq) is defined as one third of the trace of the orthogonalized Uij tensor.**

|        | x        | y        | z        | U(eq) |
|--------|----------|----------|----------|-------|
| C(1A)  | 5609(3)  | 2026(2)  | 11543(2) | 33(1) |
| C(2A)  | 6300(3)  | 2710(2)  | 12669(2) | 39(1) |
| C(3A)  | 7261(3)  | 4124(2)  | 12675(2) | 35(1) |
| N(4A)  | 7201(2)  | 4316(2)  | 11596(1) | 27(1) |
| C(5A)  | 7899(3)  | 5717(2)  | 11266(2) | 31(1) |
| N(6A)  | 7883(2)  | 5430(2)  | 10043(1) | 27(1) |
| C(7A)  | 8722(3)  | 6414(2)  | 9461(2)  | 35(1) |
| C(8A)  | 8223(3)  | 5838(2)  | 8323(2)  | 38(1) |
| C(9A)  | 7039(3)  | 4460(2)  | 8204(2)  | 33(1) |
| C(10A) | 6818(2)  | 4218(2)  | 9281(1)  | 25(1) |
| O(11A) | 4843(2)  | 1875(1)  | 9032(1)  | 33(1) |
| C(11A) | 5851(2)  | 2955(2)  | 9679(1)  | 25(1) |
| C(12A) | 6162(2)  | 3040(2)  | 10885(1) | 26(1) |
| C(1B)  | 1940(3)  | 9455(2)  | 2298(2)  | 33(1) |
| C(2B)  | 983(3)   | 10018(2) | 1512(2)  | 36(1) |
| C(3B)  | -741(3)  | 9934(2)  | 1806(2)  | 34(1) |
| N(4B)  | -863(2)  | 9322(2)  | 2731(1)  | 28(1) |
| C(5B)  | -2384(2) | 9215(2)  | 3392(1)  | 31(1) |
| N(6B)  | -2199(2) | 8181(2)  | 4131(1)  | 30(1) |
| C(7B)  | -3501(3) | 7578(2)  | 4702(2)  | 39(1) |
| C(8B)  | -2760(3) | 6844(3)  | 5437(2)  | 41(1) |
| C(9B)  | -925(3)  | 7032(2)  | 5322(2)  | 35(1) |
| C(10B) | -586(2)  | 7874(2)  | 4517(1)  | 29(1) |
| O(11B) | 2486(2)  | 8088(2)  | 4337(1)  | 37(1) |
| C(11B) | 1023(2)  | 8325(2)  | 4001(1)  | 29(1) |
| C(12B) | 791(2)   | 9037(2)  | 3059(1)  | 27(1) |

**Table 9. Bond lengths [Å] and angles [deg] for 3 (hm7004).**

---

|               |          |
|---------------|----------|
| C(1A)-C(12A)  | 1.376(2) |
| C(1A)-C(2A)   | 1.403(3) |
| C(1A)-H(1A)   | 0.9500   |
| C(2A)-C(3A)   | 1.374(3) |
| C(2A)-H(2A)   | 0.9500   |
| C(3A)-N(4A)   | 1.351(2) |
| C(3A)-H(3A)   | 0.9500   |
| N(4A)-C(12A)  | 1.384(2) |
| N(4A)-C(5A)   | 1.449(2) |
| C(5A)-N(6A)   | 1.445(2) |
| C(5A)-H(5A1)  | 0.9900   |
| C(5A)-H(5A2)  | 0.9900   |
| N(6A)-C(7A)   | 1.358(2) |
| N(6A)-C(10A)  | 1.385(2) |
| C(7A)-C(8A)   | 1.371(3) |
| C(7A)-H(7A)   | 0.9500   |
| C(8A)-C(9A)   | 1.397(3) |
| C(8A)-H(8A)   | 0.9500   |
| C(9A)-C(10A)  | 1.382(2) |
| C(9A)-H(9A)   | 0.9500   |
| C(10A)-C(11A) | 1.450(2) |
| O(11A)-C(11A) | 1.236(2) |
| C(11A)-C(12A) | 1.447(2) |
| C(1B)-C(12B)  | 1.378(3) |
| C(1B)-C(2B)   | 1.400(3) |
| C(1B)-H(1B)   | 0.9500   |
| C(2B)-C(3B)   | 1.380(3) |
| C(2B)-H(2B)   | 0.9500   |
| C(3B)-N(4B)   | 1.355(2) |
| C(3B)-H(3B)   | 0.9500   |
| N(4B)-C(12B)  | 1.387(2) |
| N(4B)-C(5B)   | 1.451(2) |
| C(5B)-N(6B)   | 1.451(2) |
| C(5B)-H(5B1)  | 0.9900   |
| C(5B)-H(5B2)  | 0.9900   |
| N(6B)-C(7B)   | 1.352(2) |
| N(6B)-C(10B)  | 1.388(2) |
| C(7B)-C(8B)   | 1.374(3) |
| C(7B)-H(7B)   | 0.9500   |
| C(8B)-C(9B)   | 1.404(3) |
| C(8B)-H(8B)   | 0.9500   |
| C(9B)-C(10B)  | 1.375(3) |
| C(9B)-H(9B)   | 0.9500   |
| C(10B)-C(11B) | 1.449(3) |

|                      |            |
|----------------------|------------|
| O(11B)-C(11B)        | 1.238(2)   |
| C(11B)-C(12B)        | 1.444(3)   |
|                      |            |
| C(12A)-C(1A)-C(2A)   | 107.48(17) |
| C(12A)-C(1A)-H(1A)   | 126.3      |
| C(2A)-C(1A)-H(1A)    | 126.3      |
| C(3A)-C(2A)-C(1A)    | 107.54(17) |
| C(3A)-C(2A)-H(2A)    | 126.2      |
| C(1A)-C(2A)-H(2A)    | 126.2      |
| N(4A)-C(3A)-C(2A)    | 108.37(17) |
| N(4A)-C(3A)-H(3A)    | 125.8      |
| C(2A)-C(3A)-H(3A)    | 125.8      |
| C(3A)-N(4A)-C(12A)   | 109.24(16) |
| C(3A)-N(4A)-C(5A)    | 125.05(15) |
| C(12A)-N(4A)-C(5A)   | 125.17(14) |
| N(6A)-C(5A)-N(4A)    | 109.52(14) |
| N(6A)-C(5A)-H(5A1)   | 109.8      |
| N(4A)-C(5A)-H(5A1)   | 109.8      |
| N(6A)-C(5A)-H(5A2)   | 109.8      |
| N(4A)-C(5A)-H(5A2)   | 109.8      |
| H(5A1)-C(5A)-H(5A2)  | 108.2      |
| C(7A)-N(6A)-C(10A)   | 109.07(15) |
| C(7A)-N(6A)-C(5A)    | 125.01(15) |
| C(10A)-N(6A)-C(5A)   | 125.34(15) |
| N(6A)-C(7A)-C(8A)    | 108.34(17) |
| N(6A)-C(7A)-H(7A)    | 125.8      |
| C(8A)-C(7A)-H(7A)    | 125.8      |
| C(7A)-C(8A)-C(9A)    | 107.80(17) |
| C(7A)-C(8A)-H(8A)    | 126.1      |
| C(9A)-C(8A)-H(8A)    | 126.1      |
| C(10A)-C(9A)-C(8A)   | 107.60(17) |
| C(10A)-C(9A)-H(9A)   | 126.2      |
| C(8A)-C(9A)-H(9A)    | 126.2      |
| C(9A)-C(10A)-N(6A)   | 107.17(16) |
| C(9A)-C(10A)-C(11A)  | 132.38(16) |
| N(6A)-C(10A)-C(11A)  | 120.25(15) |
| O(11A)-C(11A)-C(12A) | 122.37(16) |
| O(11A)-C(11A)-C(10A) | 122.27(16) |
| C(12A)-C(11A)-C(10A) | 115.36(15) |
| C(1A)-C(12A)-N(4A)   | 107.35(16) |
| C(1A)-C(12A)-C(11A)  | 131.91(17) |
| N(4A)-C(12A)-C(11A)  | 120.73(15) |
| C(12B)-C(1B)-C(2B)   | 107.72(17) |
| C(12B)-C(1B)-H(1B)   | 126.1      |
| C(2B)-C(1B)-H(1B)    | 126.1      |
| C(3B)-C(2B)-C(1B)    | 107.55(18) |
| C(3B)-C(2B)-H(2B)    | 126.2      |
| C(1B)-C(2B)-H(2B)    | 126.2      |
| N(4B)-C(3B)-C(2B)    | 108.24(17) |

|                      |            |
|----------------------|------------|
| N(4B)-C(3B)-H(3B)    | 125.9      |
| C(2B)-C(3B)-H(3B)    | 125.9      |
| C(3B)-N(4B)-C(12B)   | 109.22(16) |
| C(3B)-N(4B)-C(5B)    | 125.56(15) |
| C(12B)-N(4B)-C(5B)   | 124.48(15) |
| N(6B)-C(5B)-N(4B)    | 109.13(14) |
| N(6B)-C(5B)-H(5B1)   | 109.9      |
| N(4B)-C(5B)-H(5B1)   | 109.9      |
| N(6B)-C(5B)-H(5B2)   | 109.9      |
| N(4B)-C(5B)-H(5B2)   | 109.9      |
| H(5B1)-C(5B)-H(5B2)  | 108.3      |
| C(7B)-N(6B)-C(10B)   | 108.93(16) |
| C(7B)-N(6B)-C(5B)    | 125.61(16) |
| C(10B)-N(6B)-C(5B)   | 124.57(15) |
| N(6B)-C(7B)-C(8B)    | 108.60(17) |
| N(6B)-C(7B)-H(7B)    | 125.7      |
| C(8B)-C(7B)-H(7B)    | 125.7      |
| C(7B)-C(8B)-C(9B)    | 107.47(18) |
| C(7B)-C(8B)-H(8B)    | 126.3      |
| C(9B)-C(8B)-H(8B)    | 126.3      |
| C(10B)-C(9B)-C(8B)   | 107.52(17) |
| C(10B)-C(9B)-H(9B)   | 126.2      |
| C(8B)-C(9B)-H(9B)    | 126.2      |
| C(9B)-C(10B)-N(6B)   | 107.45(16) |
| C(9B)-C(10B)-C(11B)  | 131.94(17) |
| N(6B)-C(10B)-C(11B)  | 120.39(16) |
| O(11B)-C(11B)-C(12B) | 122.68(17) |
| O(11B)-C(11B)-C(10B) | 121.94(17) |
| C(12B)-C(11B)-C(10B) | 115.37(16) |
| C(1B)-C(12B)-N(4B)   | 107.27(16) |
| C(1B)-C(12B)-C(11B)  | 131.76(17) |
| N(4B)-C(12B)-C(11B)  | 120.83(16) |

---

Symmetry transformations used to generate equivalent atoms:

**Table 10. Anisotropic displacement parameters ( $\text{\AA}^2 \times 10^3$ ) for 3 (hm7004).  
 The anisotropic displacement factor exponent takes the form:  
 $-2 \pi^2 [ h^2 a^{*2} U_{11} + \dots + 2 h k a^* b^* U_{12} ]$**

|        | U11   | U22   | U33   | U23   | U13   | U12   |
|--------|-------|-------|-------|-------|-------|-------|
| C(1A)  | 29(1) | 32(1) | 40(1) | 12(1) | 10(1) | 8(1)  |
| C(2A)  | 43(1) | 49(1) | 33(1) | 19(1) | 12(1) | 20(1) |
| C(3A)  | 41(1) | 42(1) | 25(1) | 6(1)  | 2(1)  | 17(1) |
| N(4A)  | 28(1) | 28(1) | 25(1) | 5(1)  | -1(1) | 7(1)  |
| C(5A)  | 34(1) | 23(1) | 31(1) | 3(1)  | -5(1) | 3(1)  |
| N(6A)  | 25(1) | 24(1) | 31(1) | 6(1)  | 0(1)  | 3(1)  |
| C(7A)  | 30(1) | 27(1) | 49(1) | 14(1) | 3(1)  | 2(1)  |
| C(8A)  | 38(1) | 41(1) | 41(1) | 19(1) | 12(1) | 10(1) |
| C(9A)  | 33(1) | 36(1) | 30(1) | 8(1)  | 4(1)  | 9(1)  |
| C(10A) | 23(1) | 25(1) | 27(1) | 4(1)  | -1(1) | 5(1)  |
| O(11A) | 30(1) | 29(1) | 35(1) | 2(1)  | -3(1) | -1(1) |
| C(11A) | 21(1) | 24(1) | 30(1) | 3(1)  | 1(1)  | 5(1)  |
| C(12A) | 22(1) | 26(1) | 30(1) | 6(1)  | 3(1)  | 6(1)  |
| C(1B)  | 27(1) | 33(1) | 38(1) | 5(1)  | 0(1)  | 3(1)  |
| C(2B)  | 36(1) | 36(1) | 36(1) | 11(1) | 6(1)  | 6(1)  |
| C(3B)  | 38(1) | 32(1) | 32(1) | 7(1)  | -3(1) | 8(1)  |
| N(4B)  | 25(1) | 30(1) | 28(1) | 2(1)  | -1(1) | 7(1)  |
| C(5B)  | 24(1) | 41(1) | 27(1) | 2(1)  | -2(1) | 13(1) |
| N(6B)  | 23(1) | 41(1) | 25(1) | 4(1)  | -1(1) | 10(1) |
| C(7B)  | 24(1) | 58(1) | 33(1) | 6(1)  | 3(1)  | 8(1)  |
| C(8B)  | 34(1) | 60(1) | 30(1) | 13(1) | 7(1)  | 8(1)  |
| C(9B)  | 32(1) | 47(1) | 28(1) | 8(1)  | 0(1)  | 12(1) |
| C(10B) | 24(1) | 37(1) | 25(1) | 1(1)  | -2(1) | 9(1)  |
| O(11B) | 24(1) | 52(1) | 34(1) | 7(1)  | -2(1) | 13(1) |
| C(11B) | 25(1) | 32(1) | 27(1) | -1(1) | -2(1) | 7(1)  |
| C(12B) | 22(1) | 28(1) | 29(1) | 1(1)  | -2(1) | 5(1)  |

**Table 11. Hydrogen coordinates (  $\times 10^4$ ) and isotropic displacement parameters ( $\text{\AA}^2 \times 10^3$ ) for 3 (hm7004).**

|        | x     | y     | z     | U(eq) |
|--------|-------|-------|-------|-------|
| H(1A)  | 4890  | 1043  | 11283 | 39    |
| H(2A)  | 6134  | 2275  | 13310 | 46    |
| H(3A)  | 7865  | 4845  | 13325 | 42    |
| H(5A1) | 7162  | 6488  | 11530 | 37    |
| H(5A2) | 9133  | 6118  | 11623 | 37    |
| H(7A)  | 9519  | 7342  | 9786  | 41    |
| H(8A)  | 8613  | 6295  | 7723  | 45    |
| H(9A)  | 6487  | 3808  | 7509  | 39    |
| H(1B)  | 3163  | 9376  | 2304  | 40    |
| H(2B)  | 1438  | 10390 | 889   | 43    |
| H(3B)  | -1680 | 10250 | 1425  | 41    |
| H(5B1) | -2447 | 10233 | 3852  | 37    |
| H(5B2) | -3497 | 8836  | 2877  | 37    |
| H(7B)  | -4722 | 7650  | 4611  | 46    |
| H(8B)  | -3378 | 6306  | 5933  | 49    |
| H(9B)  | -73   | 6648  | 5727  | 42    |

**Table 12. Gas-phase structure of 3 calculated at MP2 level using the 6-31G basis set.<sup>2</sup>**

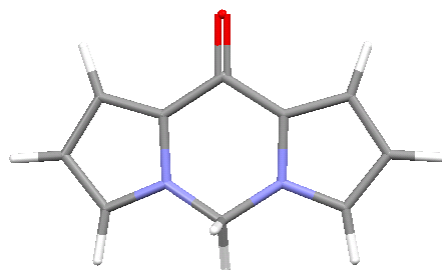

|   |           |           |           |
|---|-----------|-----------|-----------|
| C | -2.580250 | 0.932308  | -0.146171 |
| C | -1.244482 | 0.561749  | 0.091663  |
| N | -1.190693 | -0.845726 | 0.060745  |
| C | -2.472823 | -1.357529 | -0.142483 |
| C | -3.346570 | -0.267576 | -0.276612 |
| C | -0.000037 | 1.349315  | 0.143273  |
| C | 0.000024  | -1.612973 | 0.451039  |
| O | -0.000036 | 2.621767  | 0.193031  |
| C | 1.244382  | 0.561780  | 0.090929  |
| C | 2.580228  | 0.932358  | -0.146320 |
| C | 3.346614  | -0.267534 | -0.276496 |
| C | 2.472952  | -1.357488 | -0.142021 |
| N | 1.190672  | -0.845718 | 0.060453  |
| H | -2.934273 | 1.954578  | -0.227559 |
| H | -2.657339 | -2.426747 | -0.168203 |
| H | -4.411297 | -0.337212 | -0.472946 |
| H | -0.000064 | -2.576581 | -0.073861 |
| H | 0.000162  | -1.785299 | 1.538157  |
| H | 2.934158  | 1.954605  | -0.228444 |
| H | 4.411556  | -0.337132 | -0.471672 |
| H | 2.657292  | -2.426707 | -0.168910 |



**Table 13. Comparison of X-Ray structures (bond lengths/Å and bond angles/°) of **2** and **3** and corresponding data from *ab initio* calculations.**

| <b>2</b>          | <b>Crystal</b> | <b>MP2/6-31G<sup>a</sup></b> | <b>3</b>             | <b>Crystal</b> | <b>MP2/6-31G<sup>a</sup></b> |
|-------------------|----------------|------------------------------|----------------------|----------------|------------------------------|
| C(1)-C(2)         | 1.401(5)       | 1.4245                       | C(1A)-C(12A)         | 1.376(2)       | 1.4064                       |
| C(1)-C(13)        | 1.395(5)       | 1.4122                       | C(1A)-(2A)           | 1.403(3)       | 1.4297                       |
| C(2)-C(3)         | 1.370(6)       | 1.4015                       | C(2A)-C(3A)          | 1.374(3)       | 1.4033                       |
| C(3)-N(4)         | 1.354(4)       | 1.3978                       | C(3A)-N(4A)          | 1.351(2)       | 1.3954                       |
| N(4)-C(5)         | 1.459(4)       | 1.4739                       | N(4A)-C(12A)         | 1.384(2)       | 1.4088                       |
| N(4)-C(13)        | 1.390(4)       | 1.4083                       | N(4A)-C(5A)          | 1.449(2)       | 1.4690                       |
| C(5)-C(6)         | 1.516(5)       | 1.5365                       | C(5A)-N(6A)          | 1.445(2)       | 1.4690                       |
| C(6)-N(7)         | 1.460(4)       | 1.4739                       | N(6A)-C(7A)          | 1.358(2)       | 1.3954                       |
| N(7)-C(8)         | 1.351(5)       | 1.3978                       | N(6A)-C(10A)         | 1.385(2)       | 1.4089                       |
| N(7)-C(12)        | 1.379(4)       | 1.4083                       | C(7A)-C(8A)          | 1.371(3)       | 1.4033                       |
| C(8)-C(9)         | 1.379(5)       | 1.4015                       | C(8A)-C(9A)          | 1.397(3)       | 1.4297                       |
| C(9)-C(10)        | 1.383(5)       | 1.4245                       | C(9A)-C(10A)         | 1.382(2)       | 1.4064                       |
| C(10)-C(12)       | 1.391(5)       | 1.4122                       | C(10A)-C(11A)        | 1.450(2)       | 1.4736                       |
| C(11)-C(12)       | 1.445(5)       | 1.4787                       | O(11A)-C(11A)        | 1.236(2)       | 1.2734                       |
| C(11)-C(13)       | 1.455(4)       | 1.4787                       | C(11A)-C(12A)        | 1.447(2)       | 1.4736                       |
| C(11)-O(1)        | 1.251(4)       | 1.2800                       |                      |                |                              |
| C(2)-C(1)-C(13)   | 107.6(3)       | 108.15                       | C(12A)-C(1A)-C(2A)   | 107.48(17)     | 107.66                       |
| C(1)-C(2)-C(3)    | 107.3(3)       | 107.52                       | C(3A)-C(2A)-C(1A)    | 107.54(17)     | 108.02                       |
| C(2)-C(3)-N(4)    | 109.4(3)       | 108.20                       | N(4A)-C(3A)-C(2A)    | 108.37(17)     | 107.53                       |
| C(3)-N(4)-C(5)    | 122.9(3)       | 123.58                       | C(3A)-N(4A)-C(12A)   | 109.24(16)     | 109.54                       |
| C(3)-N(4)-C(13)   | 108.8(3)       | 109.13                       | C(3A)-N(4A)-C(5A)    | 125.05(15)     | 126.28                       |
| C(5)-N(4)-C(13)   | 128.2(3)       | 127.29                       | C(12A)-N(4A)-C(5A)   | 125.17(14)     | 123.15                       |
| N(4)-C(5)-C(6)    | 111.5(3)       | 111.41                       | N(6A)-C(5A)-N(4A)    | 109.52(14)     | 108.26                       |
| C(5)-C(6)-N(7)    | 110.6(3)       | 111.41                       | C(7A)-N(6A)-C(10A)   | 109.07(15)     | 109.54                       |
| C(6)-N(7)-C(8)    | 123.7(3)       | 123.58                       | C(7A)-N(6A)-C(5A)    | 125.01(15)     | 126.28                       |
| C(6)-N(7)-C(12)   | 127.0(3)       | 127.28                       | C(10A)-N(6A)-C(5A)   | 125.34(15)     | 123.15                       |
| C(8)-N(7)-C(12)   | 109.3(3)       | 109.13                       | N(6A)-C(7A)-C(8A)    | 108.34(17)     | 107.53                       |
| N(7)-C(8)-C(9)    | 108.7(3)       | 108.20                       | C(7A)-C(8A)-C(9A)    | 107.80(17)     | 108.02                       |
| C(8)-C(9)-C(10)   | 107.1(3)       | 107.52                       | C(10A)-C(9A)-C(8A)   | 107.60(17)     | 107.66                       |
| C(9)-C(10)-C(12)  | 108.4(3)       | 108.15                       | C(9A)-C(10A)-N(6A)   | 107.17(16)     | 107.21                       |
| C(12)-C(11)-C(13) | 124.1(3)       | 124.30                       | C(9A)-C(10A)-C(11A)  | 132.38(16)     | 131.86                       |
| C(12)-C(11)-O(1)  | 118.9(3)       | 117.85                       | N(6A)-C(10A)-C(11A)  | 120.25(15)     | 120.16                       |
| C(13)-C(11)-O(1)  | 116.9(3)       | 117.85                       | O(11A)-C(11A)-C(12A) | 122.37(16)     | 122.37                       |
| C(11)-C(12)-C(10) | 126.2(3)       | 125.39                       | O(11A)-C(11A)-C(10A) | 122.27(16)     | 122.37                       |
| C(11)-C(12)-N(7)  | 127.3(3)       | 127.60                       | C(12A)-C(11A)-C(10A) | 115.36(15)     | 115.23                       |
| C(10)-C(12)-N(7)  | 106.5(3)       | 107.00                       | C(1A)-C(12A)-N(4A)   | 107.35(16)     | 107.20                       |
| C(11)-C(13)-C(1)  | 125.0(3)       | 125.39                       | C(1A)-C(12A)-C(11A)  | 131.91(17)     | 131.85                       |
| C(11)-C(13)-N(4)  | 128.0(3)       | 127.60                       | N(4A)-C(12A)-C(11A)  | 120.73(15)     | 120.16                       |
| C(1)-C(13)-N(4)   | 106.9(3)       | 107.00                       |                      |                |                              |

**Table 1:** <sup>a</sup> Geometry optimisation performed with 6-31G basis set.

Though the absolute values differ, the trends in the experimental solid-state parameters noted in the Tables above for structures **2** and **3** are almost identical to the MP2 values calculated.

The calculated values for the lengths of the internal C-N bonds of the pyrrole are slightly longer than the external bonds, but the difference is not as pronounced as in the solid state.

The carbonyl bond lengths are: **2**, 1.280 Å; **3**, 1.273 Å; therefore **2** shows a greater level of conjugation than **3**, although once again the difference is not as pronounced as in the crystal structures.

The calculated internal angles at the carbonyls are exactly the same as in the crystal structures.

**Table 14. Gas-phase structure of 7 calculated at MP2 level using the 6-31G basis set.<sup>2</sup>**

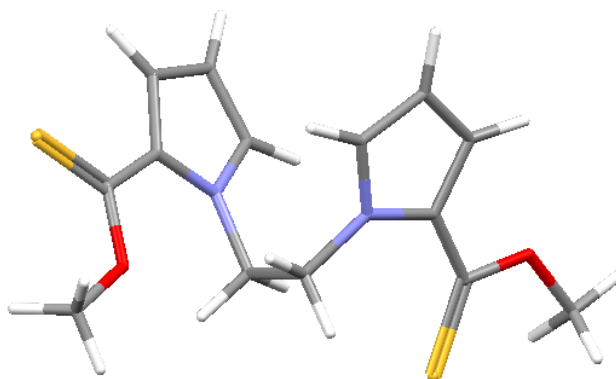

|   |           |           |           |
|---|-----------|-----------|-----------|
| C | 2.521284  | -1.971850 | -1.014747 |
| C | 2.326704  | -0.609064 | -0.673281 |
| N | 1.012521  | -0.267937 | -1.069611 |
| C | 0.404163  | -1.397687 | -1.616016 |
| C | 1.322399  | -2.458153 | -1.595679 |
| C | 0.250190  | 0.978093  | -0.824311 |
| C | 3.317567  | 0.289111  | -0.101806 |
| N | -0.963660 | -0.101450 | 1.066471  |
| C | -0.366645 | -1.162615 | 1.744112  |
| C | -1.298257 | -2.205651 | 1.860602  |
| C | -2.493078 | -1.780813 | 1.227981  |
| C | -2.281281 | -0.469966 | 0.718437  |
| C | -3.271524 | 0.369406  | 0.067421  |
| S | -3.177441 | 2.024058  | -0.379651 |
| O | -4.413073 | -0.384496 | -0.160070 |
| C | -5.601348 | 0.258082  | -0.772833 |
| S | 4.900937  | -0.158493 | 0.358091  |
| O | 2.833640  | 1.587088  | 0.046118  |
| C | 3.737875  | 2.634261  | 0.589150  |
| C | -0.179348 | 1.084528  | 0.652295  |
| H | 3.447340  | -2.513902 | -0.857315 |
| H | -0.627894 | -1.357059 | -1.948575 |
| H | 1.140728  | -3.460904 | -1.967403 |
| H | -0.639375 | 0.932489  | -1.464010 |
| H | 0.851621  | 1.844987  | -1.107939 |
| H | 0.669890  | -1.097755 | 2.057826  |
| H | -1.125524 | -3.156330 | 2.353676  |
| H | -3.425842 | -2.326000 | 1.144872  |
| H | -5.354720 | 0.633469  | -1.771146 |
| H | -5.952016 | 1.082014  | -0.143076 |
| H | -6.328651 | -0.554331 | -0.815993 |
| H | 4.612609  | 2.744106  | -0.059162 |
| H | 4.057190  | 2.366527  | 1.601236  |
| H | 3.115893  | 3.531433  | 0.584501  |
| H | -0.766921 | 1.992481  | 0.812649  |
| H | 0.710958  | 1.108606  | 1.290476  |

**Table 15. Crystal data and structure refinement for 8 (hm8001).**

Contact Simon Parsons, s.parsons@ed.ac.uk

**A. CRYSTAL DATA**

Empirical formula C<sub>13</sub> H<sub>14</sub> N<sub>2</sub> O<sub>2</sub> S<sub>2</sub>  
C<sub>13</sub> H<sub>14</sub> N<sub>2</sub> O<sub>2</sub> S<sub>2</sub>  
Formula weight 294.38  
Wavelength 0.71073 Å  
Temperature 150(2) K  
Crystal system Triclinic  
Space group P-1

Unit cell dimensions a = 8.0365(2) Å alpha = 98.8420(10) deg.  
b = 8.9123(2) Å beta = 107.7310(10) deg.  
c = 11.2816(3) Å gamma = 111.5210(10) deg.

Volume 683.11(3) Å<sup>3</sup>  
Number of reflections for cell 8646 (2.5 < theta < 30 deg.)  
Z 2  
Density (calculated) 1.431 Mg/m<sup>3</sup>  
Absorption coefficient 0.388 mm<sup>-1</sup>  
F(000) 308

**B. DATA COLLECTION**

Crystal description orange block  
Crystal size 0.45 x 0.37 x 0.26 mm  
Instrument Bruker Smart APEX CCD  
Theta range for data collection 1.99 to 29.97 deg.  
Index ranges -11 <= h <= 9, -12 <= k <= 12, -15 <= l <= 15  
Reflections collected 11638  
Independent reflections 3705 [R(int) = 0.0269]  
Scan type omega and phi  
Absorption correction Multiscan  
(Tmin= 0.753, Tmax=0.903)

**C. SOLUTION AND REFINEMENT.**

Solution Patterson (DIRDIF)  
Refinement type Full-matrix least-squares on F<sup>2</sup>  
Program used for refinement SHELXL-97  
Hydrogen atom placement geom  
Hydrogen atom treatment riding  
Data / restraints / parameters 3705/5/201  
Goodness-of-fit on F<sup>2</sup> 1.145  
Conventional R [F > 4sigma(F)] R1 = 0.0481 [3502 data]  
Weighted R (F<sup>2</sup> and all data) wR2 = 0.1180  
Extinction coefficient 0.018(3)  
Final maximum delta/sigma 0.000  
Weighting scheme  
calc w=1/[s<sup>2</sup>(Fo<sup>2</sup>)+(0.0469P)<sup>2</sup>+0.3545P] where P=(Fo<sup>2</sup>+2Fc<sup>2</sup>)/3  
Largest diff. peak and hole 0.425 and -0.300 e.Å<sup>-3</sup>

**Table 16. Atomic coordinates ( $\times 10^4$ ), equivalent isotropic displacement parameters ( $\text{\AA}^2 \times 10^3$ ) and site occupancies for 8 (hm8001). U(eq) is defined as one third of the trace of the orthogonalized Uij tensor.**

|        | x        | y         | z        | U(eq) | Occ     |
|--------|----------|-----------|----------|-------|---------|
| N(1)   | 8816(2)  | -1673(2)  | 3166(1)  | 26(1) | 1       |
| C(2)   | 9096(2)  | -2386(2)  | 4185(1)  | 25(1) | 1       |
| C(3)   | 10491(2) | -2953(2)  | 4170(2)  | 30(1) | 1       |
| C(4)   | 11038(3) | -2598(2)  | 3145(2)  | 35(1) | 1       |
| C(5)   | 9996(2)  | -1814(2)  | 2549(2)  | 31(1) | 1       |
| C(6)   | 7576(2)  | -857(2)   | 2770(2)  | 28(1) | 1       |
| C(7)   | 8095(2)  | -2537(2)  | 5061(2)  | 27(1) | 1       |
| S(8)   | 6272(1)  | -2160(1)  | 5017(1)  | 34(1) | 0.80(1) |
| O(9)   | 8994(3)  | -3131(3)  | 5998(2)  | 32(1) | 0.80(1) |
| C(10)  | 8219(4)  | -3455(3)  | 6988(2)  | 36(1) | 0.80(1) |
| S(8')  | 8252(6)  | -3313(4)  | 6187(3)  | 42(1) | 0.20(1) |
| O(9')  | 6821(11) | -1732(11) | 4679(7)  | 40(2) | 0.20(1) |
| C(10') | 5613(14) | -1766(14) | 5418(10) | 46(3) | 0.20(1) |
| N(1A)  | 5601(2)  | -2109(2)  | 1856(1)  | 25(1) | 1       |
| C(2A)  | 4066(2)  | -1782(2)  | 1193(1)  | 26(1) | 1       |
| C(3A)  | 2495(2)  | -3342(2)  | 449(2)   | 33(1) | 1       |
| C(4A)  | 3069(3)  | -4602(2)  | 659(2)   | 35(1) | 1       |
| C(5A)  | 4990(3)  | -3804(2)  | 1527(2)  | 32(1) | 1       |
| C(7A)  | 4140(2)  | -129(2)   | 1271(2)  | 28(1) | 1       |
| S(8A)  | 2309(1)  | 189(1)    | 399(1)   | 42(1) | 1       |
| O(9A)  | 5835(2)  | 1101(2)   | 2133(1)  | 33(1) | 1       |
| C(10A) | 6162(3)  | 2833(2)   | 2302(2)  | 40(1) | 1       |

**Table 17. Bond lengths [Å] and angles [deg] for 8 (hm8001).**

|                   |            |
|-------------------|------------|
| N(1)-C(5)         | 1.364(2)   |
| N(1)-C(2)         | 1.3959(19) |
| N(1)-C(6)         | 1.443(2)   |
| C(2)-C(3)         | 1.391(2)   |
| C(2)-C(7)         | 1.445(2)   |
| C(3)-C(4)         | 1.397(2)   |
| C(4)-C(5)         | 1.368(2)   |
| C(6)-N(1A)        | 1.475(2)   |
| C(7)-O(9)         | 1.381(2)   |
| C(7)-O(9')        | 1.454(6)   |
| C(7)-S(8')        | 1.531(3)   |
| C(7)-S(8)         | 1.6082(17) |
| O(9)-C(10)        | 1.453(3)   |
| O(9')-C(10')      | 1.455(8)   |
| N(1A)-C(5A)       | 1.354(2)   |
| N(1A)-C(2A)       | 1.391(2)   |
| C(2A)-C(3A)       | 1.392(2)   |
| C(2A)-C(7A)       | 1.440(2)   |
| C(3A)-C(4A)       | 1.387(3)   |
| C(4A)-C(5A)       | 1.381(2)   |
| C(7A)-O(9A)       | 1.331(2)   |
| C(7A)-S(8A)       | 1.6498(16) |
| O(9A)-C(10A)      | 1.439(2)   |
|                   |            |
| C(5)-N(1)-C(2)    | 108.49(13) |
| C(5)-N(1)-C(6)    | 121.82(14) |
| C(2)-N(1)-C(6)    | 129.67(14) |
| C(3)-C(2)-N(1)    | 106.60(14) |
| C(3)-C(2)-C(7)    | 126.95(14) |
| N(1)-C(2)-C(7)    | 126.44(14) |
| C(2)-C(3)-C(4)    | 108.32(15) |
| C(5)-C(4)-C(3)    | 107.25(15) |
| N(1)-C(5)-C(4)    | 109.34(15) |
| N(1)-C(6)-N(1A)   | 110.81(12) |
| O(9)-C(7)-C(2)    | 106.23(16) |
| O(9)-C(7)-O(9')   | 147.4(3)   |
| C(2)-C(7)-O(9')   | 105.1(3)   |
| O(9)-C(7)-S(8')   | 25.82(12)  |
| C(2)-C(7)-S(8')   | 131.1(2)   |
| O(9')-C(7)-S(8')  | 123.8(3)   |
| O(9)-C(7)-S(8)    | 123.91(15) |
| C(2)-C(7)-S(8)    | 129.85(13) |
| O(9')-C(7)-S(8)   | 26.3(3)    |
| S(8')-C(7)-S(8)   | 98.63(18)  |
| C(7)-O(9)-C(10)   | 117.68(19) |
| C(7)-O(9')-C(10') | 115.0(7)   |
| C(5A)-N(1A)-C(2A) | 108.44(14) |
| C(5A)-N(1A)-C(6)  | 124.47(14) |
| C(2A)-N(1A)-C(6)  | 127.09(13) |
| N(1A)-C(2A)-C(3A) | 106.86(14) |
| N(1A)-C(2A)-C(7A) | 125.46(14) |
| C(3A)-C(2A)-C(7A) | 127.67(15) |
| C(4A)-C(3A)-C(2A) | 108.39(15) |
| C(5A)-C(4A)-C(3A) | 106.84(16) |
| N(1A)-C(5A)-C(4A) | 109.47(16) |
| O(9A)-C(7A)-C(2A) | 112.45(13) |
| O(9A)-C(7A)-S(8A) | 124.13(13) |

C(2A)-C(7A)-S(8A) 123.42(13)  
 C(7A)-O(9A)-C(10A) 119.38(14)

Symmetry transformations used to generate equivalent atoms:

**Table 18. Anisotropic displacement parameters ( $\text{\AA}^2 \times 10^3$ ) for 8 (hm8001).  
 The anisotropic displacement factor exponent takes the form:  
 $-2 \pi^2 [ h^2 a^{*2} U_{11} + \dots + 2 h k a^* b^* U_{12} ]$**

|        | U11   | U22   | U33   | U23   | U13   | U12   |
|--------|-------|-------|-------|-------|-------|-------|
| N(1)   | 25(1) | 26(1) | 26(1) | 9(1)  | 7(1)  | 12(1) |
| C(2)   | 24(1) | 24(1) | 24(1) | 7(1)  | 7(1)  | 11(1) |
| C(3)   | 30(1) | 31(1) | 31(1) | 10(1) | 10(1) | 17(1) |
| C(4)   | 34(1) | 39(1) | 37(1) | 11(1) | 17(1) | 21(1) |
| C(5)   | 31(1) | 33(1) | 28(1) | 10(1) | 13(1) | 12(1) |
| C(6)   | 26(1) | 22(1) | 30(1) | 7(1)  | 2(1)  | 10(1) |
| C(7)   | 25(1) | 23(1) | 27(1) | 3(1)  | 7(1)  | 7(1)  |
| S(8)   | 30(1) | 45(1) | 36(1) | 13(1) | 15(1) | 23(1) |
| O(9)   | 34(1) | 44(1) | 31(1) | 20(1) | 18(1) | 22(1) |
| C(10)  | 40(1) | 44(1) | 30(1) | 17(1) | 18(1) | 19(1) |
| S(8')  | 53(2) | 43(1) | 41(2) | 24(1) | 21(1) | 24(1) |
| O(9')  | 42(4) | 58(5) | 39(4) | 22(3) | 32(3) | 27(4) |
| C(10') | 42(5) | 49(6) | 39(5) | 7(4)  | 19(5) | 11(5) |
| N(1A)  | 25(1) | 23(1) | 24(1) | 7(1)  | 6(1)  | 9(1)  |
| C(2A)  | 22(1) | 33(1) | 23(1) | 9(1)  | 9(1)  | 12(1) |
| C(3A)  | 24(1) | 41(1) | 27(1) | 7(1)  | 9(1)  | 8(1)  |
| C(4A)  | 32(1) | 29(1) | 33(1) | 1(1)  | 12(1) | 4(1)  |
| C(5A)  | 34(1) | 23(1) | 33(1) | 6(1)  | 9(1)  | 10(1) |
| C(7A)  | 29(1) | 38(1) | 28(1) | 16(1) | 16(1) | 19(1) |
| S(8A)  | 38(1) | 63(1) | 43(1) | 27(1) | 16(1) | 34(1) |
| O(9A)  | 33(1) | 27(1) | 41(1) | 13(1) | 12(1) | 17(1) |
| C(10A) | 52(1) | 30(1) | 53(1) | 19(1) | 27(1) | 25(1) |

**Table 19. Hydrogen coordinates ( $\times 10^4$ ) and isotropic displacement parameters ( $\text{\AA}^2 \times 10^3$ ) for 8 (hm8001).**

---

|        | x     | y     | z    | U(eq) | Occ     |
|--------|-------|-------|------|-------|---------|
| H(3)   | 10986 | -3490 | 4757 | 36    | 1       |
| H(4)   | 11961 | -2854 | 2906 | 42    | 1       |
| H(5)   | 10080 | -1429 | 1820 | 37    | 1       |
| H(6A)  | 8136  | -24   | 2344 | 34    | 1       |
| H(6B)  | 7505  | -241  | 3548 | 34    | 1       |
| H(10A) | 8983  | -3869 | 7589 | 54    | 0.80(1) |
| H(10B) | 6860  | -4309 | 6570 | 54    | 0.80(1) |
| H(10C) | 8292  | -2407 | 7475 | 54    | 0.80(1) |
| H(10D) | 4837  | -1168 | 5116 | 69    | 0.20(1) |
| H(10E) | 6444  | -1213 | 6347 | 69    | 0.20(1) |
| H(10F) | 4745  | -2942 | 5289 | 69    | 0.20(1) |
| H(3A)  | 1244  | -3513 | -108 | 40    | 1       |
| H(4A)  | 2289  | -5786 | 280  | 42    | 1       |
| H(5A)  | 5764  | -4358 | 1843 | 38    | 1       |
| H(10G) | 7468  | 3580  | 2966 | 60    | 1       |
| H(10H) | 5192  | 3014  | 2582 | 60    | 1       |
| H(10I) | 6050  | 3086  | 1474 | 60    | 1       |

---

**Table 20. Gas-phase structure of 8 calculated at MP2 level using the 6-31G basis set.<sup>2</sup>**

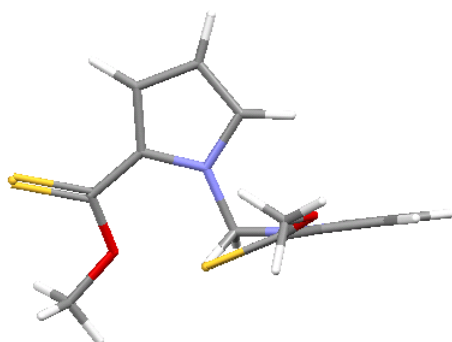

|   |           |           |           |
|---|-----------|-----------|-----------|
| C | 1.973949  | -0.419334 | 2.313623  |
| C | 1.883104  | -0.381359 | 0.902043  |
| N | 0.629026  | -0.927185 | 0.551252  |
| C | -0.049085 | -1.291039 | 1.717796  |
| C | 0.771135  | -0.983067 | 2.814019  |
| C | 0.061251  | -1.063648 | -0.819884 |
| C | 2.901160  | 0.055713  | -0.038358 |
| N | -1.381525 | -1.300842 | -0.744029 |
| C | -1.927616 | -2.588380 | -0.820746 |
| C | -3.295956 | -2.506364 | -0.542969 |
| C | -3.595824 | -1.140471 | -0.267360 |
| C | -2.400758 | -0.394203 | -0.387512 |
| C | -2.249347 | 1.048328  | -0.229063 |
| S | -0.993184 | 2.061932  | -0.785057 |
| O | -3.360945 | 1.534900  | 0.439034  |
| C | -3.490294 | 2.997484  | 0.656601  |
| S | 4.296678  | 0.949787  | 0.361789  |
| O | 2.609483  | -0.359076 | -1.334826 |
| C | 3.525487  | 0.031652  | -2.436623 |
| H | 2.830537  | -0.071379 | 2.880700  |
| H | -1.047773 | -1.709793 | 1.681509  |
| H | 0.518063  | -1.153067 | 3.855201  |
| H | 0.511008  | -1.920818 | -1.332044 |
| H | 0.262884  | -0.154244 | -1.379819 |
| H | -1.296294 | -3.436795 | -1.062538 |
| H | -3.995993 | -3.334962 | -0.552497 |
| H | -4.563335 | -0.713873 | -0.029833 |
| H | -3.508461 | 3.521809  | -0.304663 |
| H | -2.653685 | 3.360197  | 1.262136  |
| H | -4.440713 | 3.088701  | 1.184633  |
| H | 4.518736  | -0.393888 | -2.263268 |
| H | 3.592759  | 1.122501  | -2.497468 |
| H | 3.052320  | -0.394180 | -3.323406 |



## References

1. U. Burger and F. Dreier, *Tetrahedron*, 1983, **39**, 2065-2071.
2. M. J. Frisch, G. W. Trucks, H. B. Schlegel, G. E. Scuseria, M. A. Robb, J. R. Cheeseman, J. A. Montgomery, Jr., T. Vreven, K. N. Kudin, J. C. Burant, J. M. Millam, S. S. Iyengar, J. Tomasi, V. Barone, B. Mennucci, M. Cossi, G. Scalmani, N. Rega, G. A. Petersson, H. Nakatsuji, M. Hada, M. Ehara, K. Toyota, R. Fukuda, J. Hasegawa, M. Ishida, T. Nakajima, Y. Honda, O. Kitao, H. Nakai, M. Klene, X. Li, J. E. Knox, H. P. Hratchian, J. B. Cross, V. Bakken, C. Adamo, J. Jaramillo, R. Gomperts, R. E. Stratmann, O. Yazyev, A. J. Austin, R. Cammi, C. Pomelli, J. W. Ochterski, P. Y. Ayala, K. Morokuma, G. A. Voth, P. Salvador, J. J. Dannenberg, V. G. Zakrzewski, S. Dapprich, A. D. Daniels, M. C. Strain, O. Farkas, D. K. Malick, A. D. Rabuck, K. Raghavachari, J. B. Foresman, J. V. Ortiz, Q. Cui, A. G. Baboul, S. Clifford, J. Cioslowski, B. B. Stefanov, G. Liu, A. Liashenko, P. Piskorz, I. Komaromi, I.; R. L. Martin, D. J. Fox, T. Keith, M. A. Al-Laham, C. Y. Peng, A. Nanayakkara, M. Challacombe, P. M. W. Gill, B. Johnson, W. Chen, M. W. Wong, C. Gonzalez and J. A. Pople, Gaussian03; Gaussian, Inc., Wallingford CT, 2004.

## 1,2-Di(pyrrol-1-yl)ethane 4

$^1\text{H}$

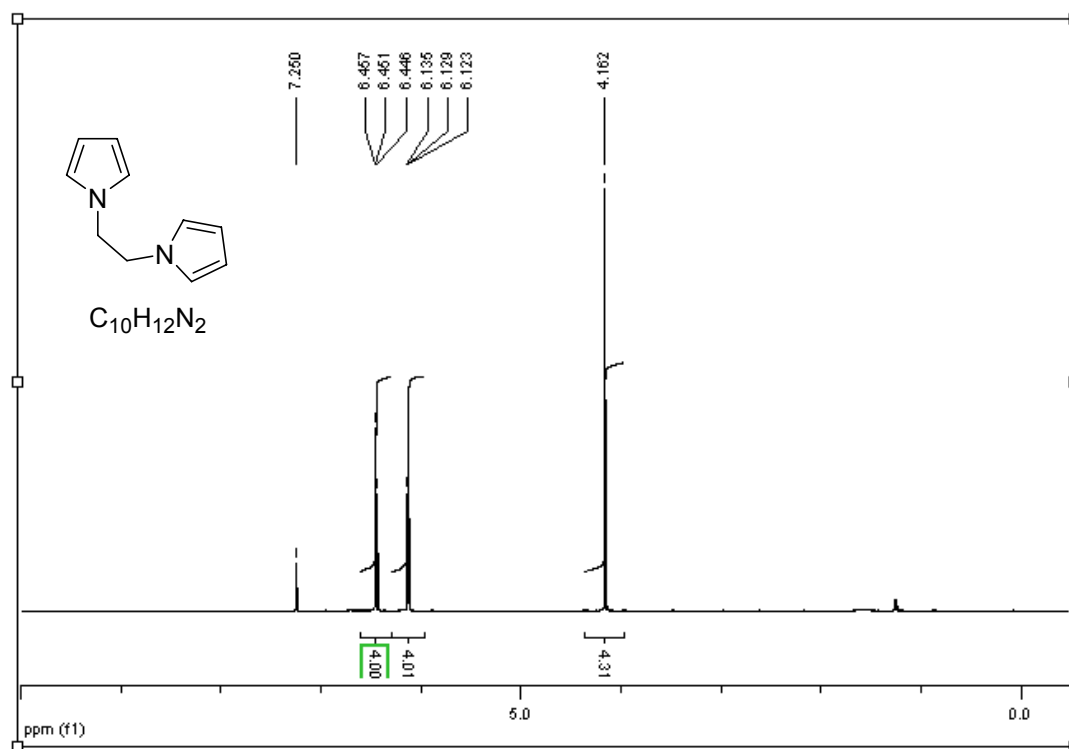

$^{13}\text{C}$

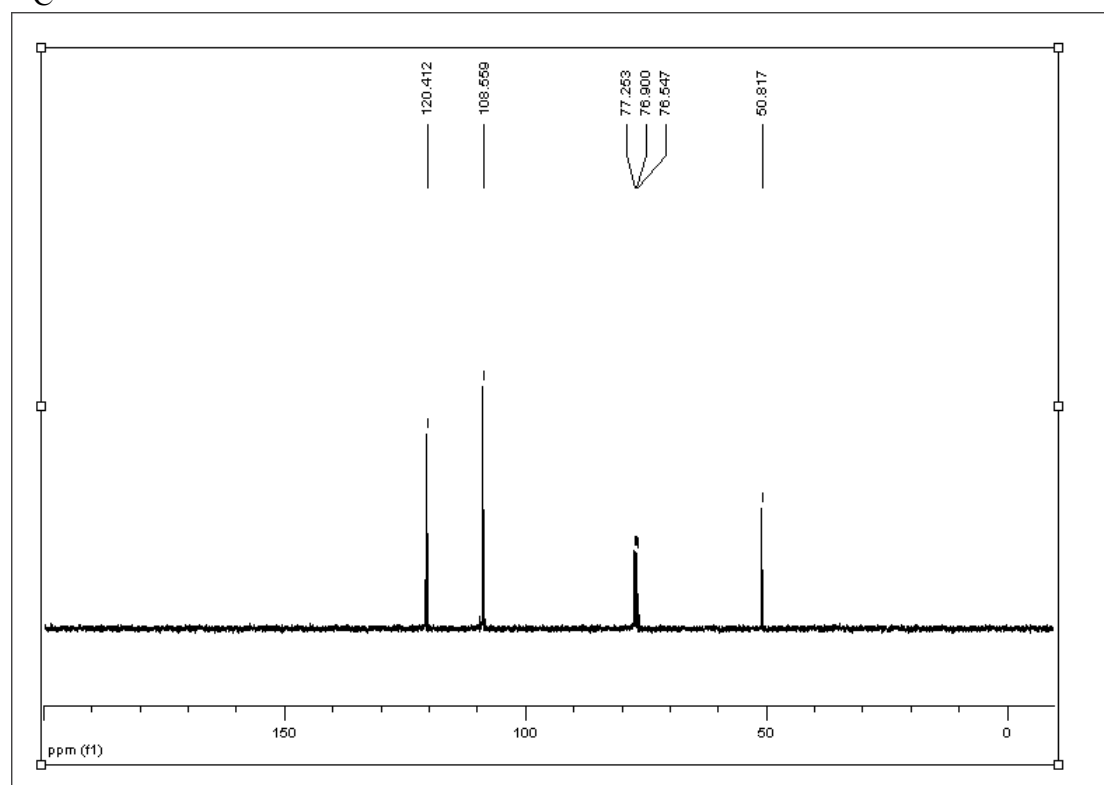

dept135

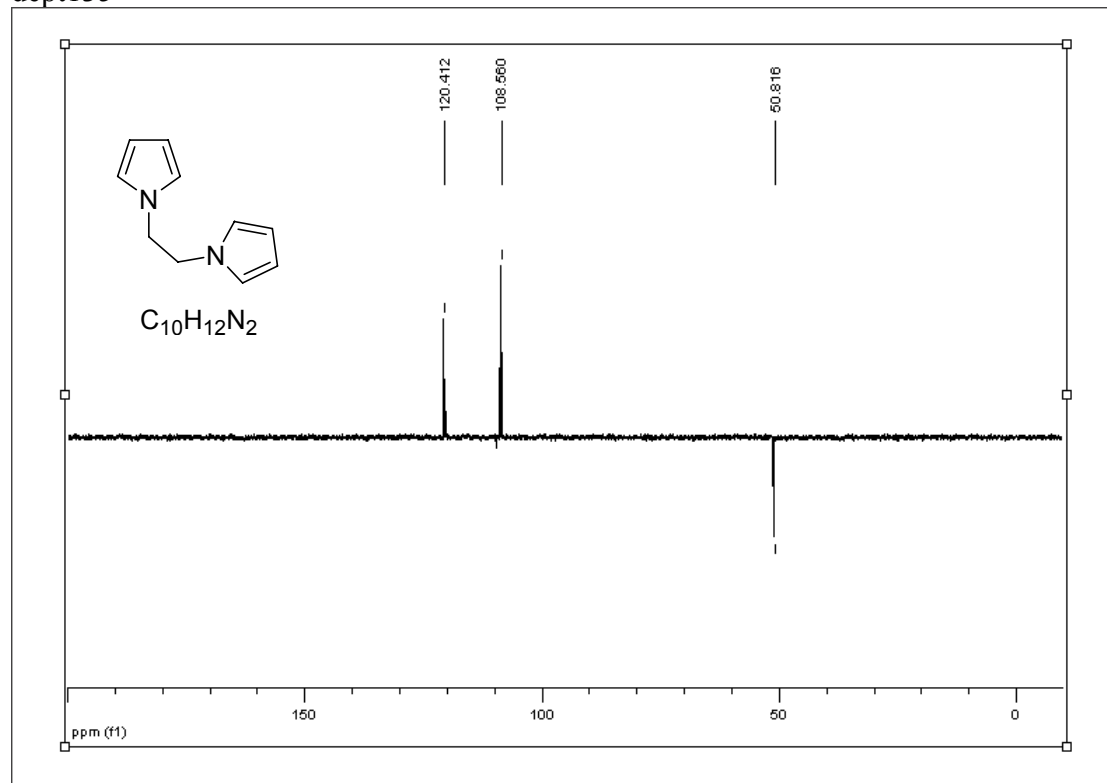

dept90

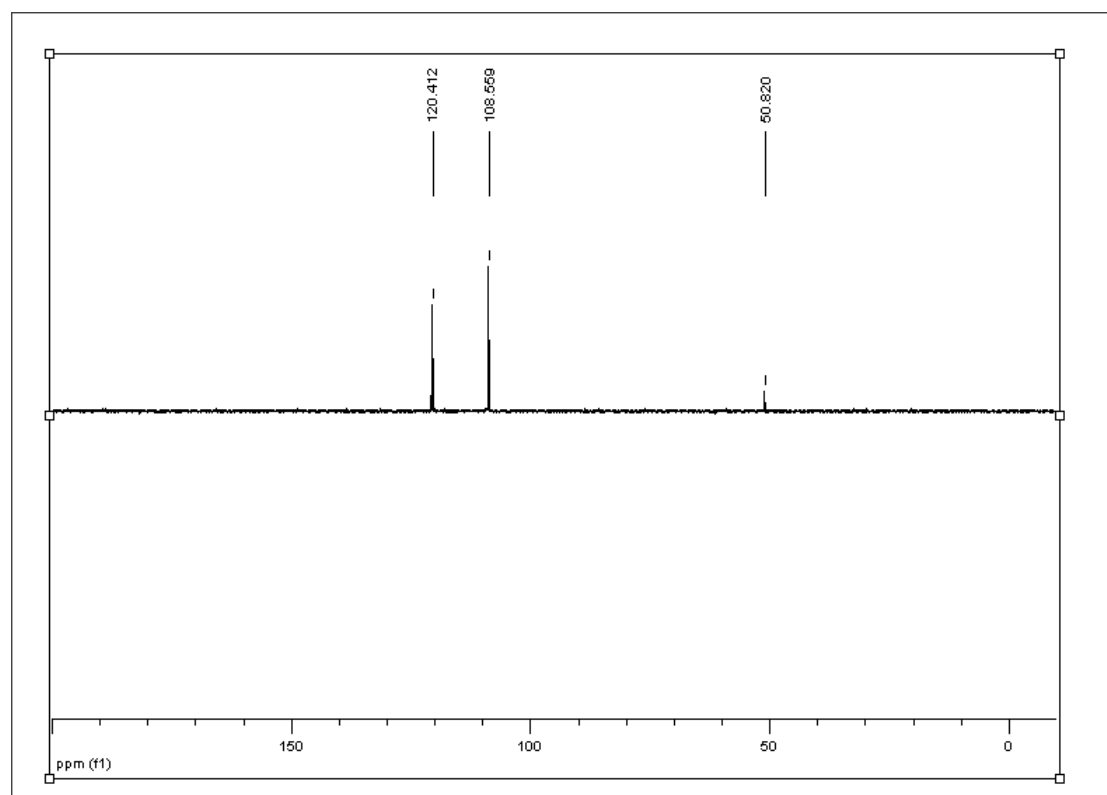

## 5,6-Dihydrodipyrrolo[1,2-*d*;1',2'-*g*][1,4]diazepin-11-one 2

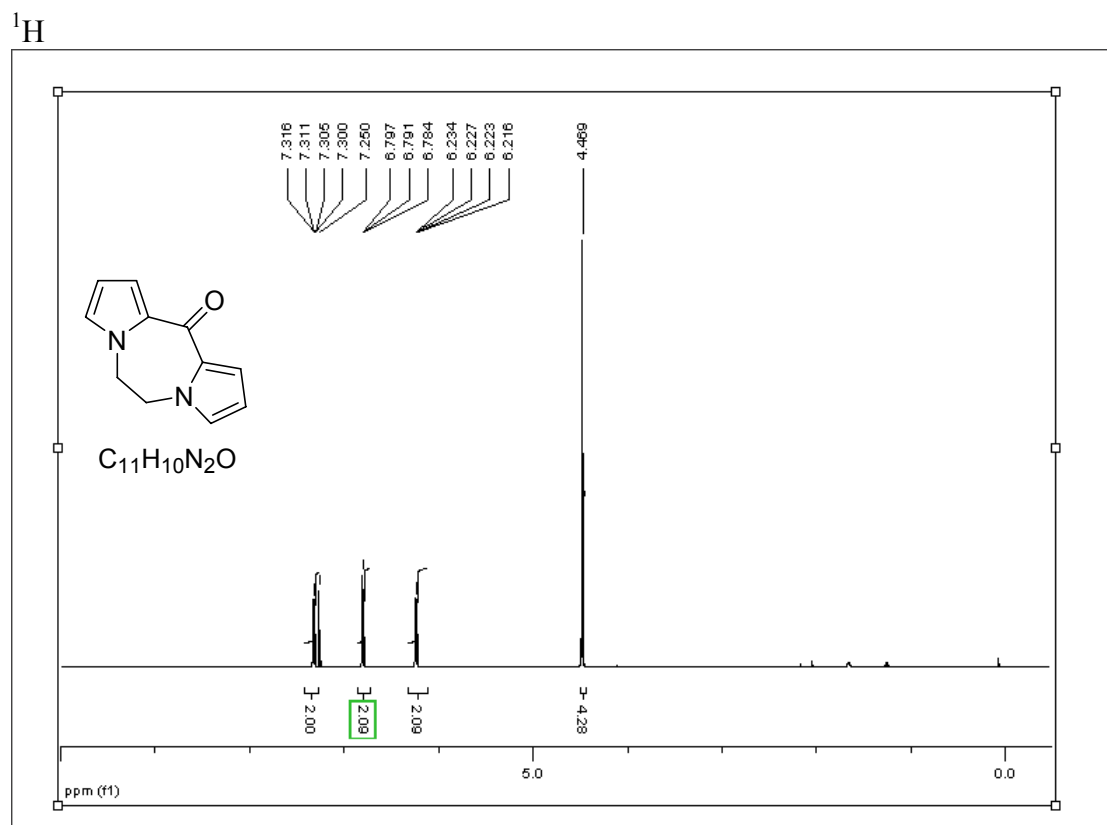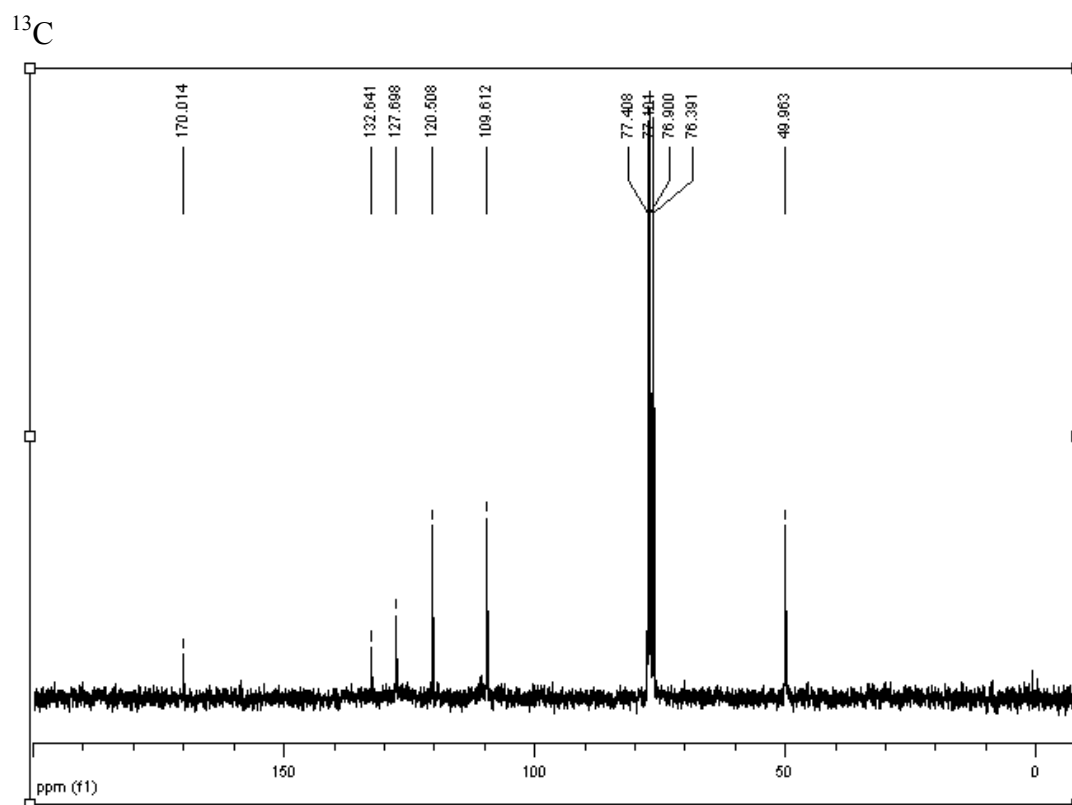

dept135

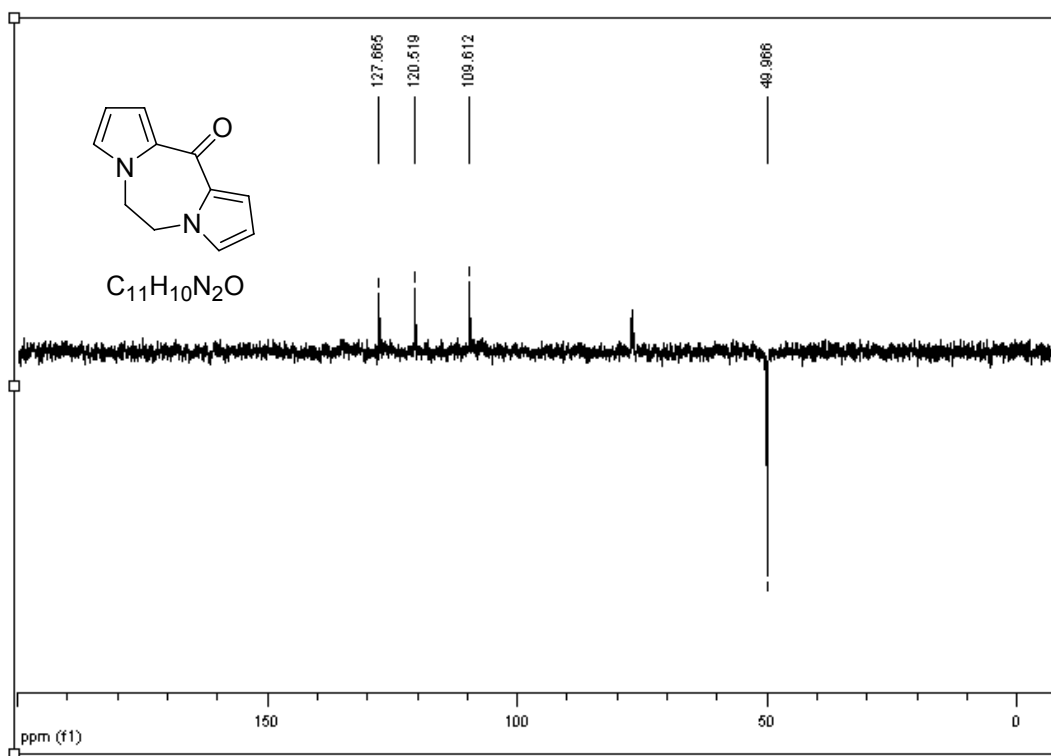

dept90

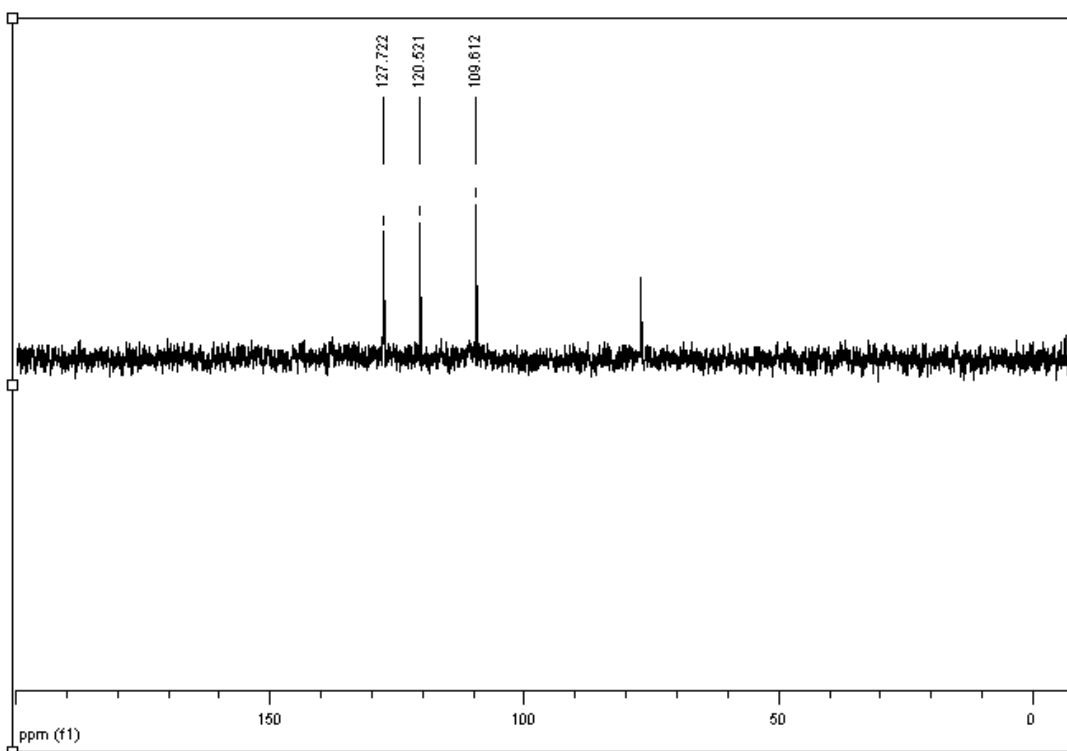

## 1,1-Di(pyrrol-1-yl)methane 5

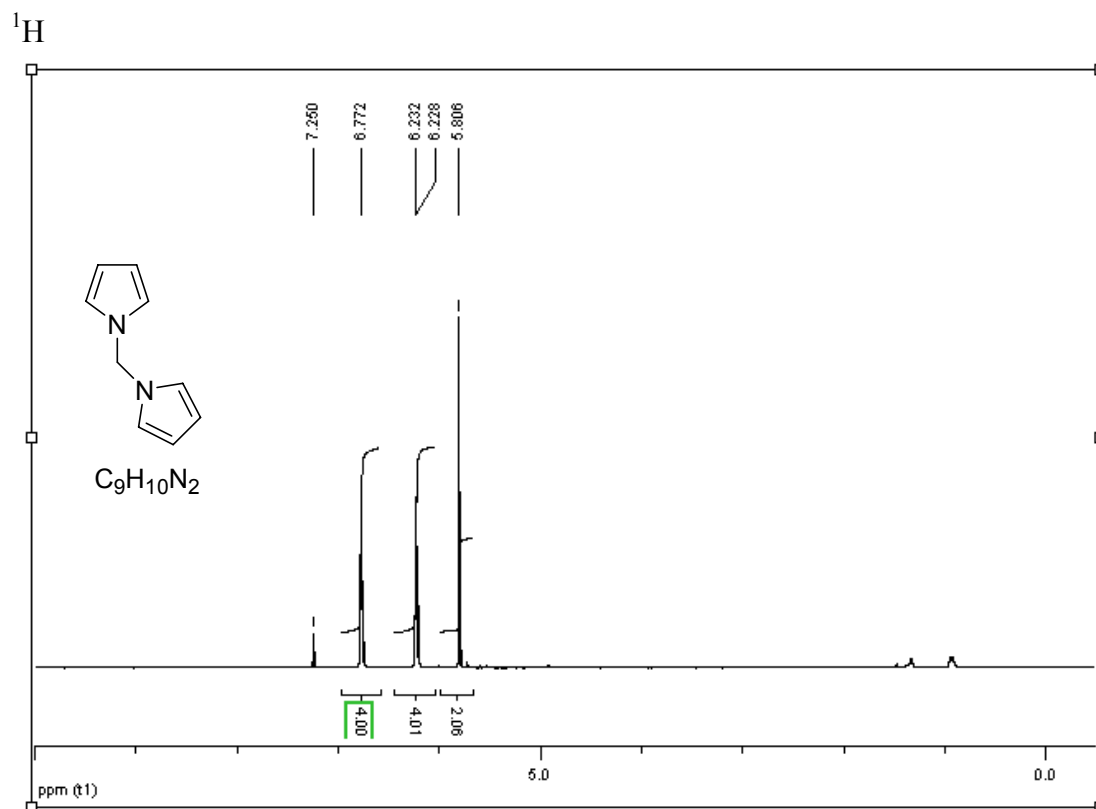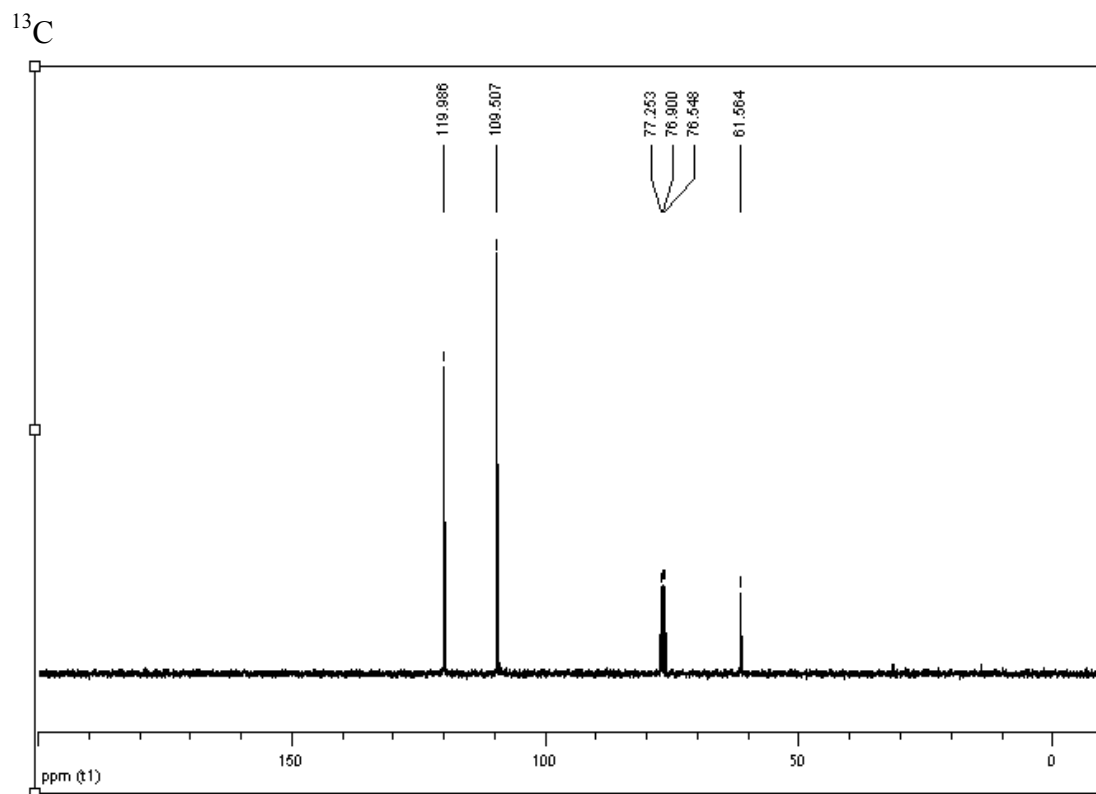

dept135

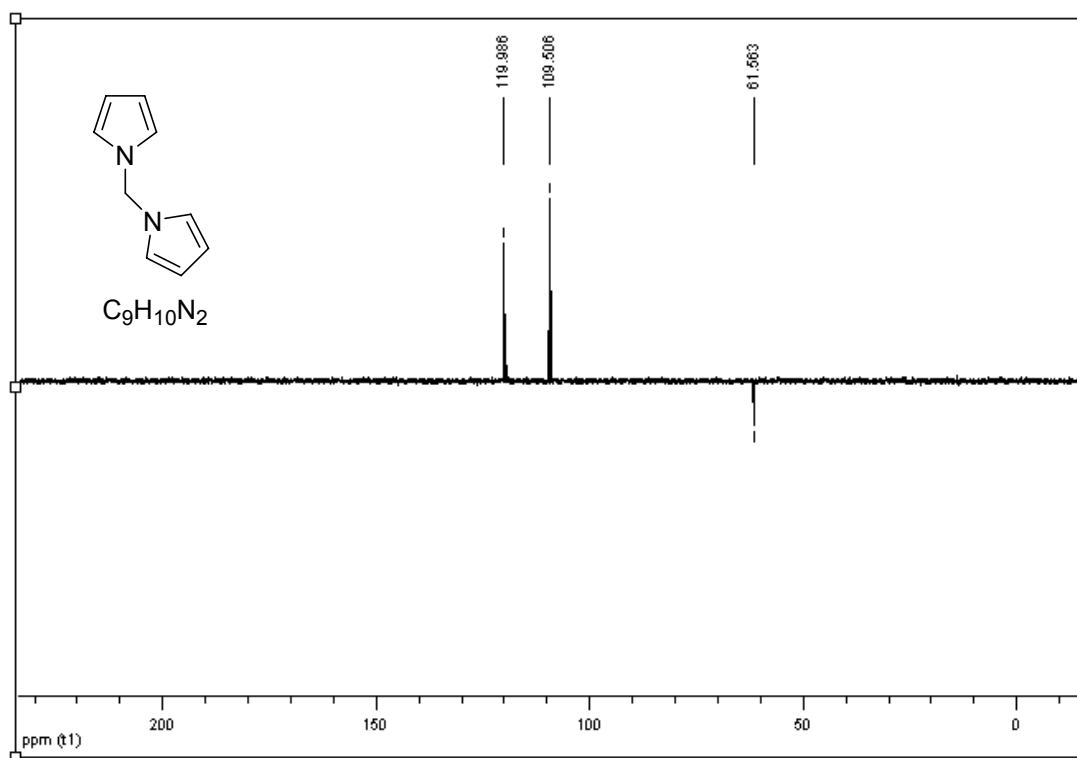

dept90

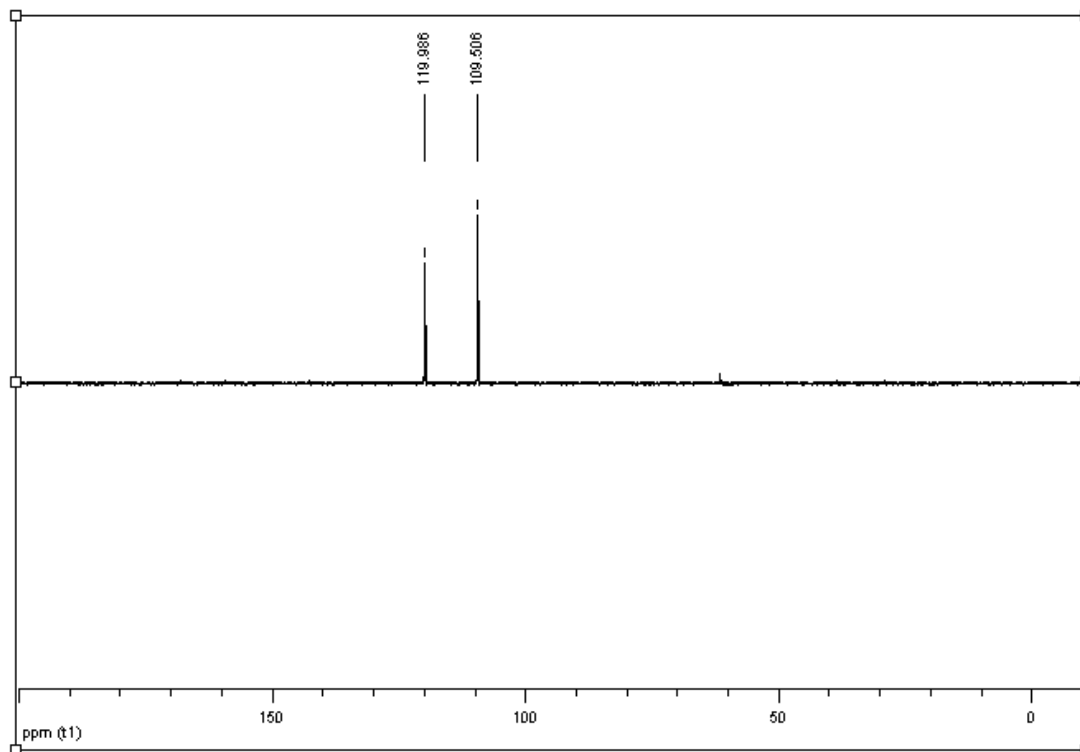

### Dipyrrolo[1,2-*c*;1',2'-*f*]pyrimidin-10-one 3

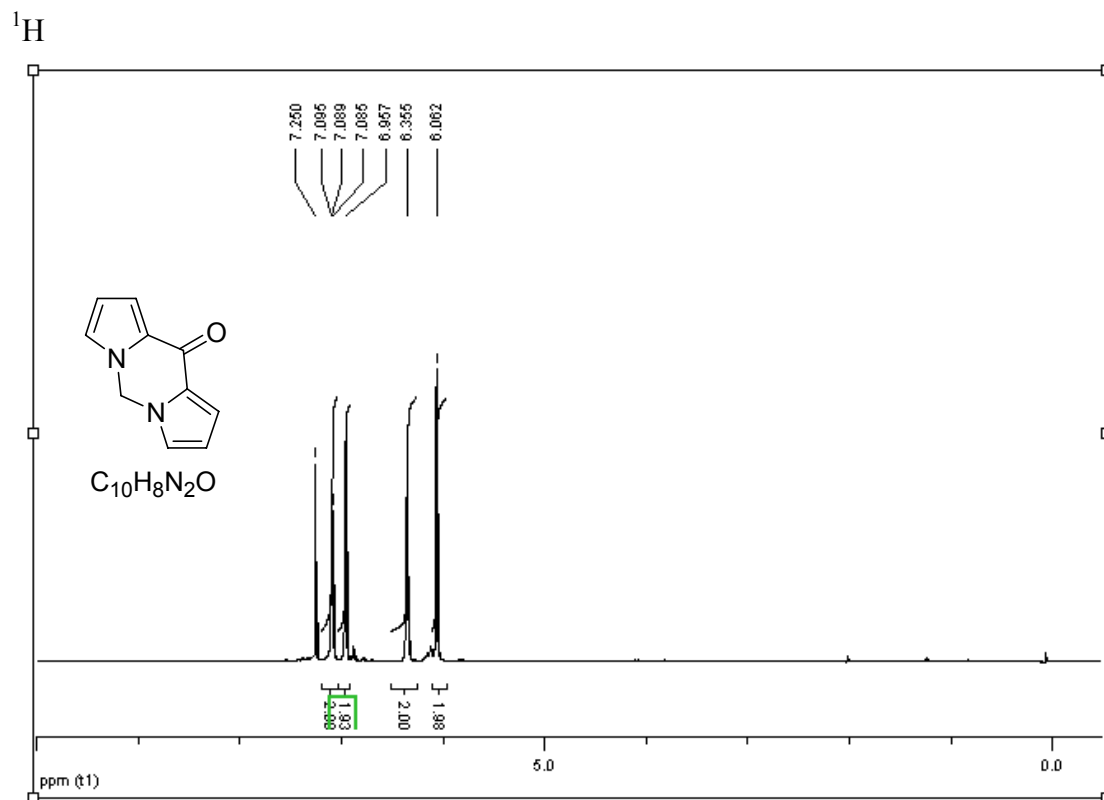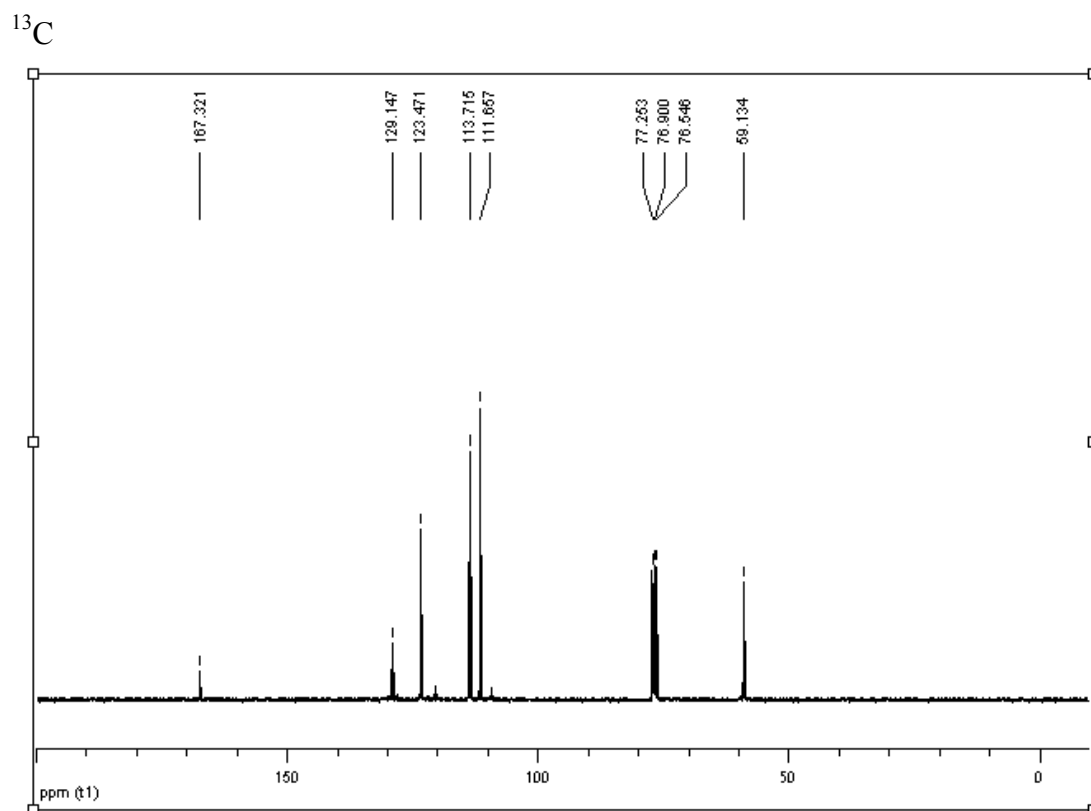



dept135

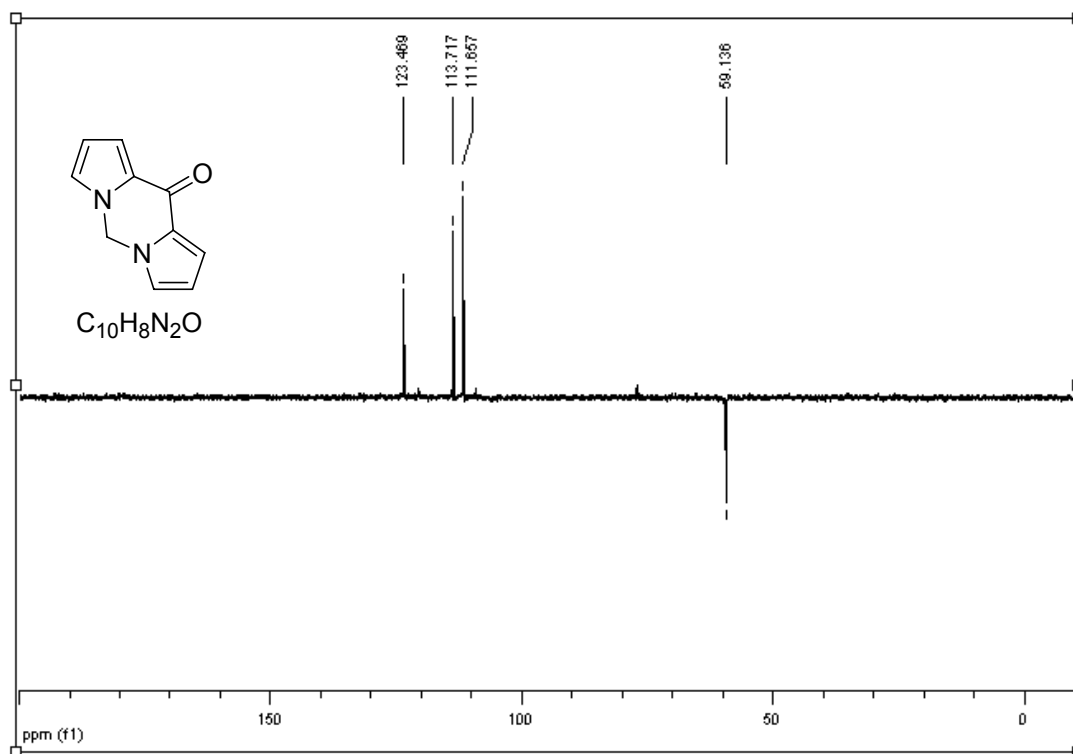

dept90

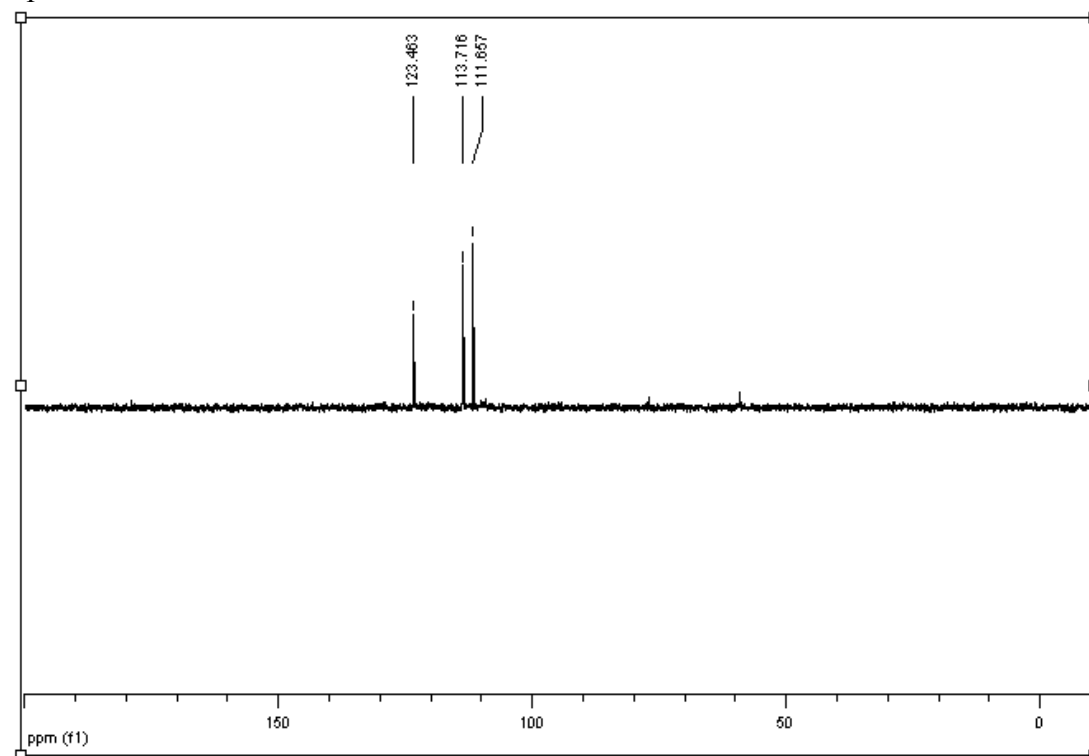

### 1-(Pyrrol-1-yl)-1-(2-carboxypyrrol-1-yl)methane 6

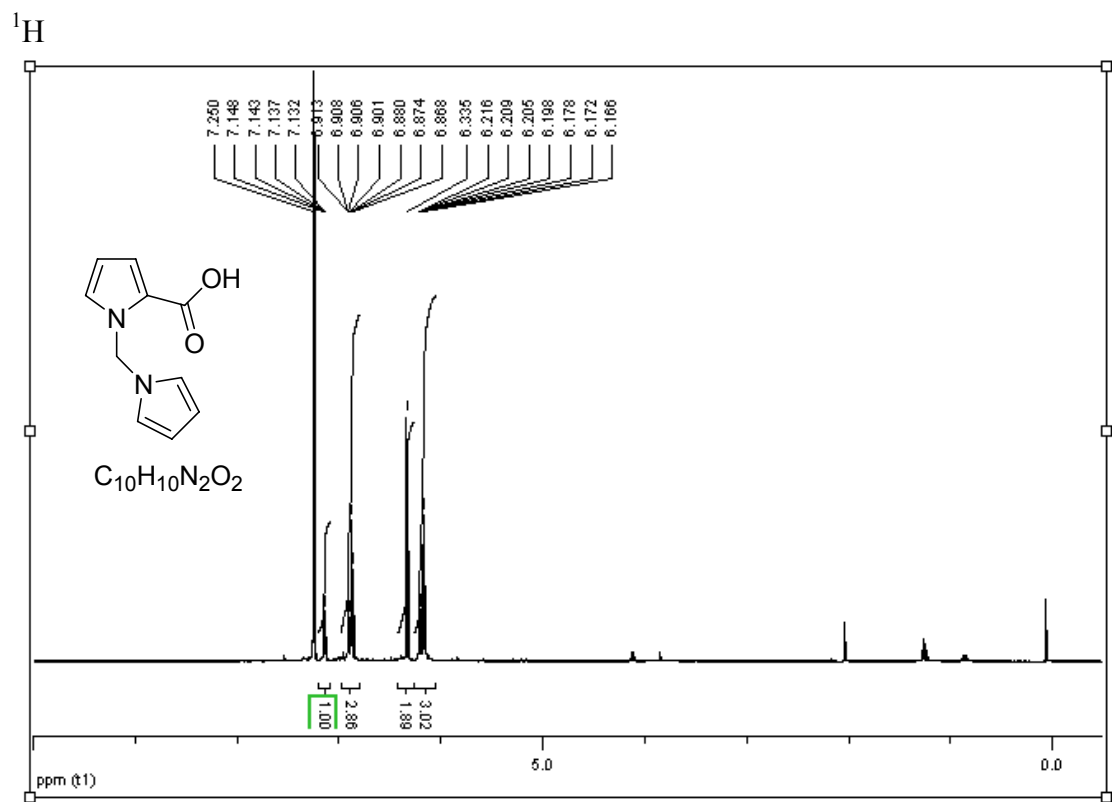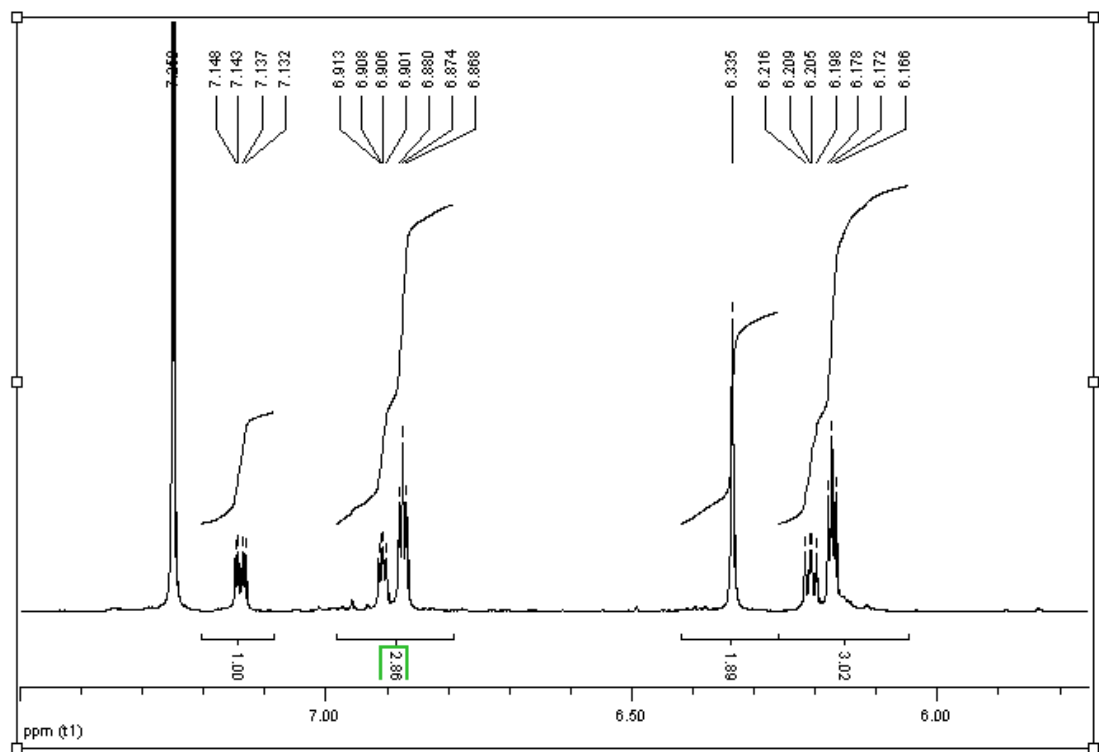

$^{13}\text{C}$

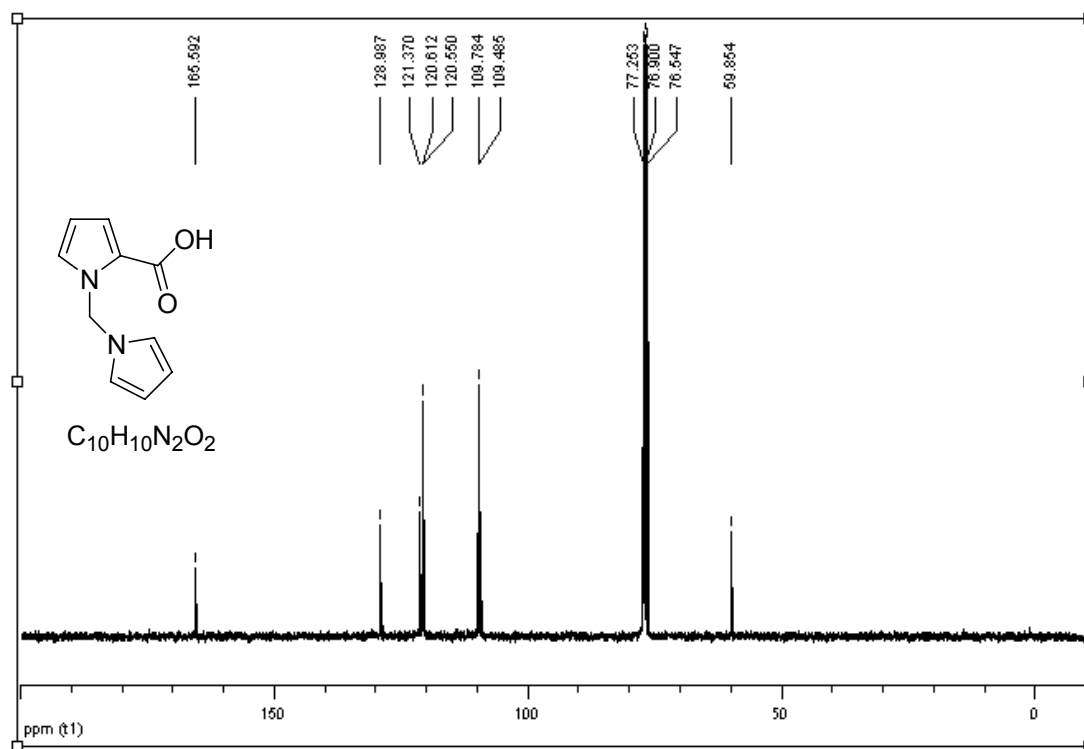

dept135

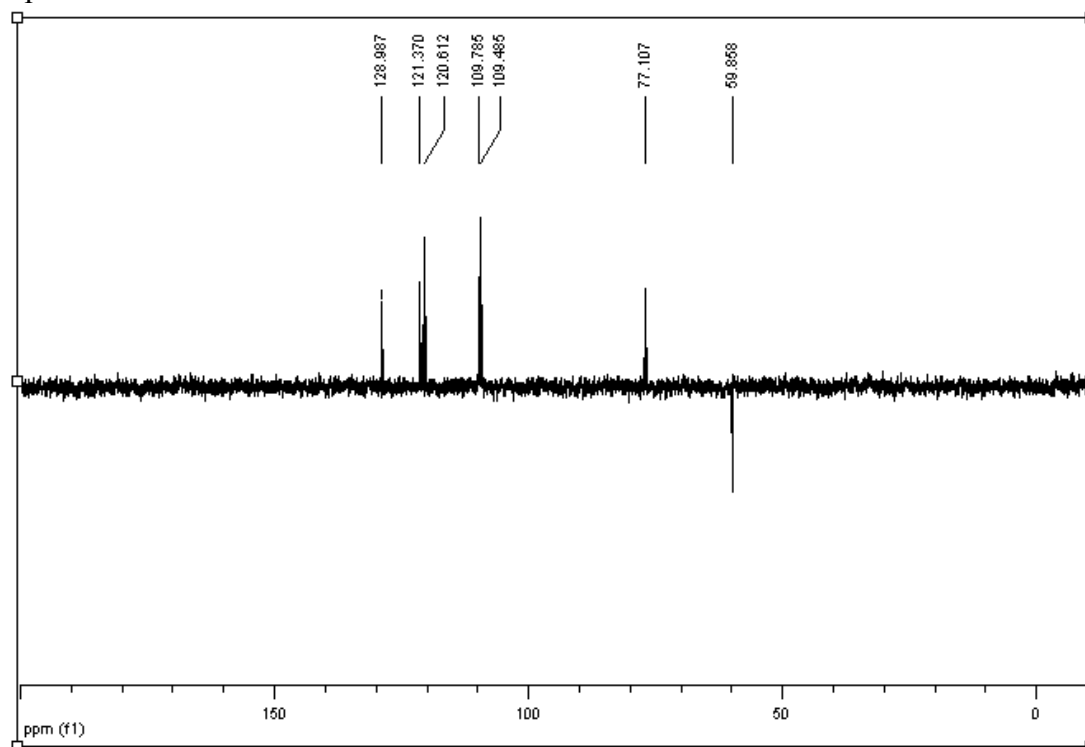

dept90

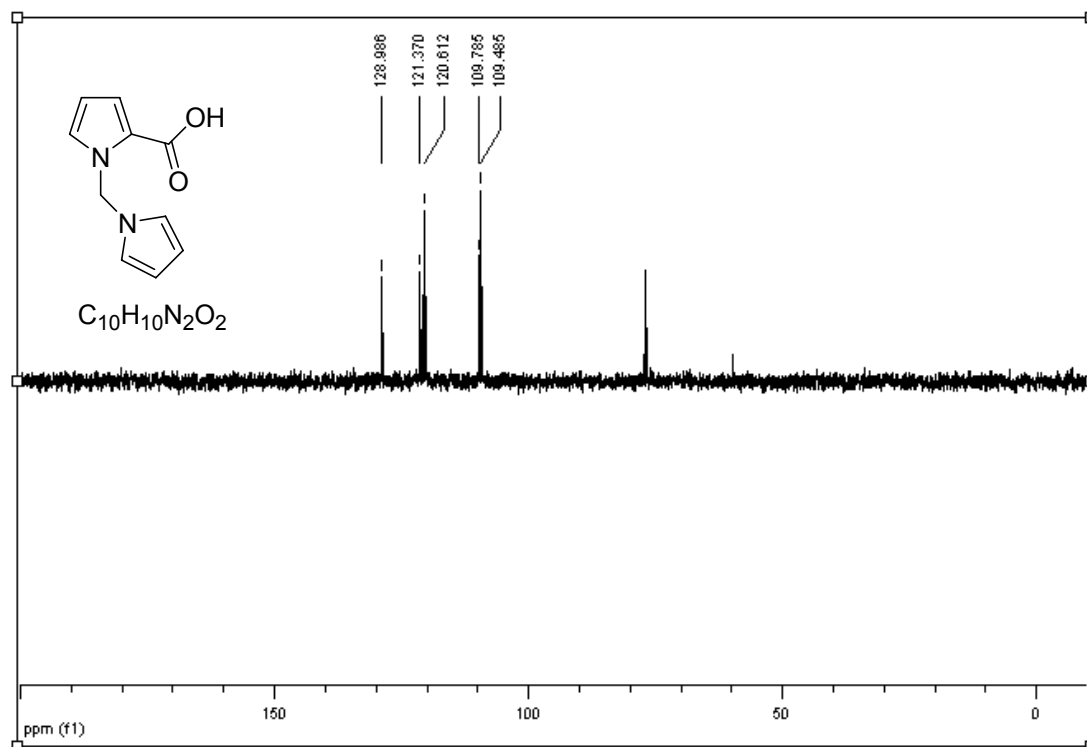

### Initial product from the reaction of thiophosgene with 1,2-di(pyrrol-1-yl)ethane

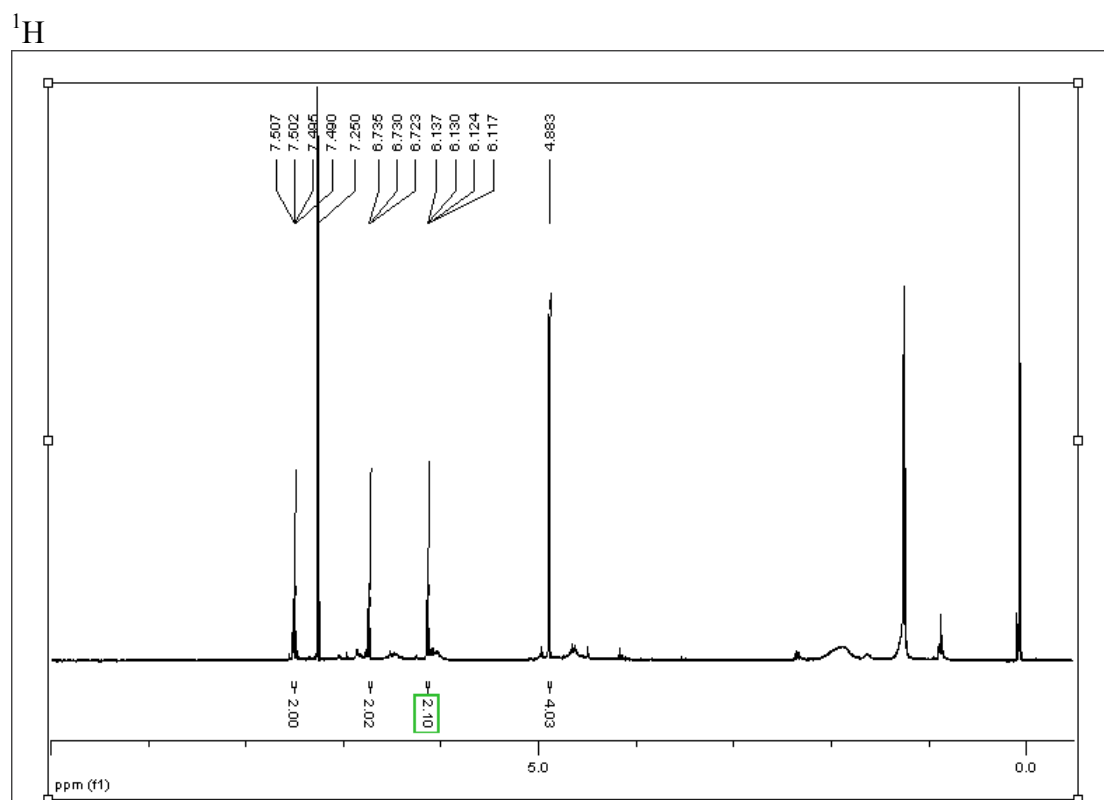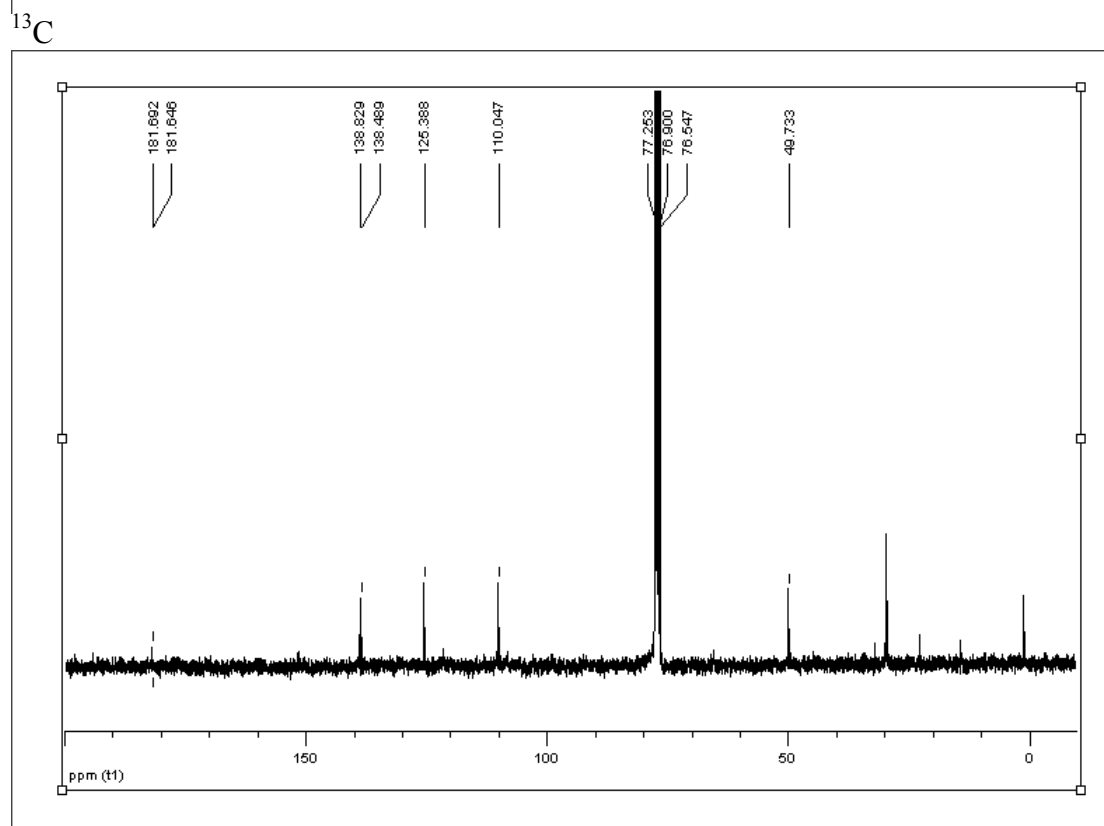

## 1,2-Di[2-(carbothiomethoxy)pyrrol-1-yl]ethane 7

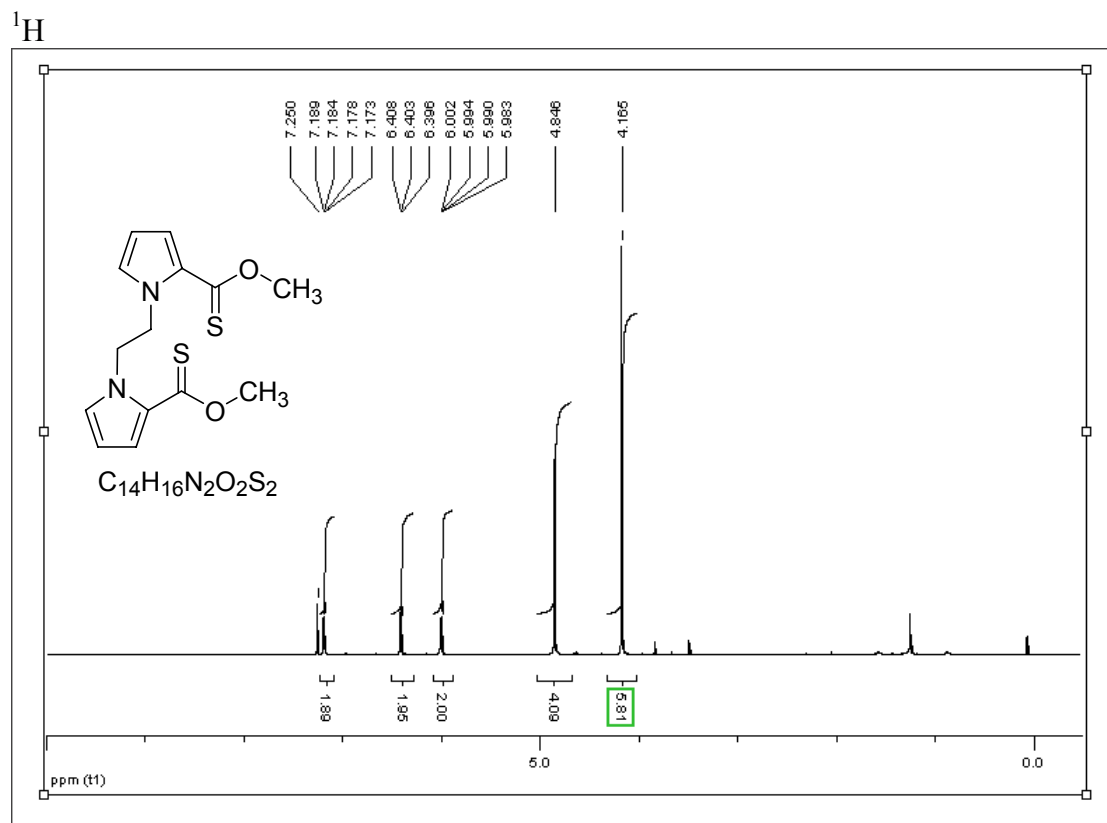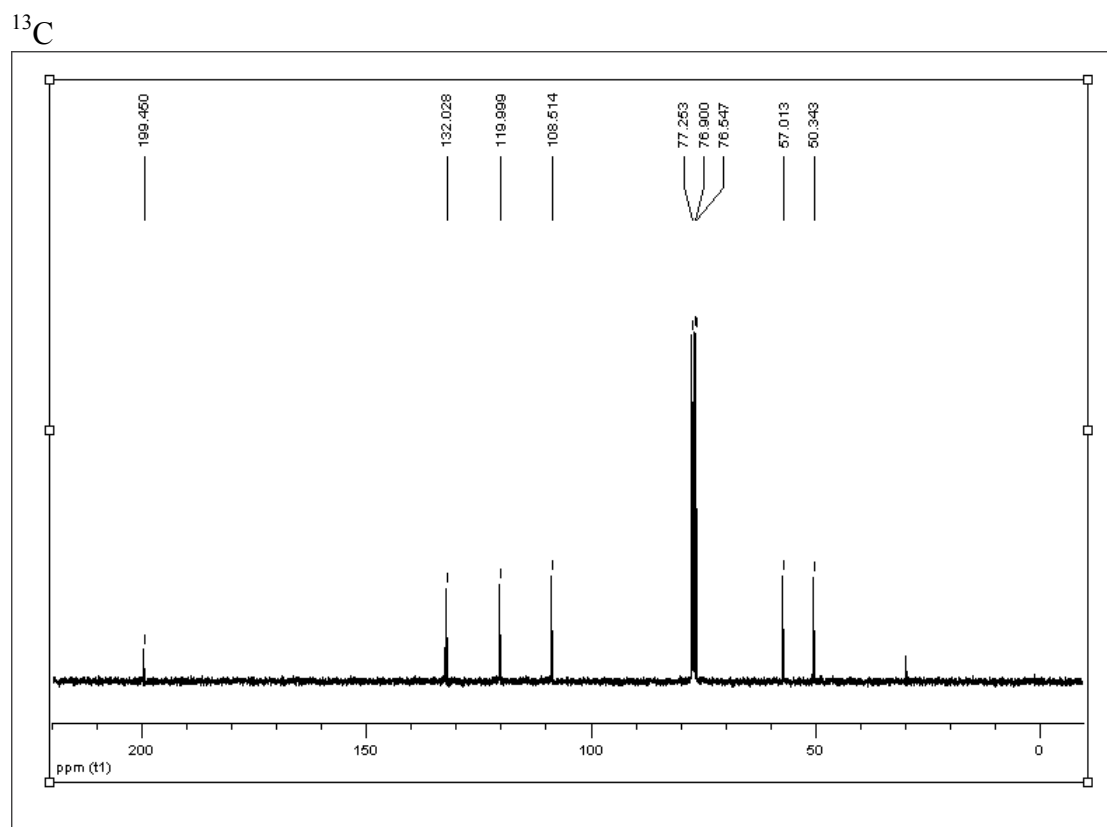

dept135

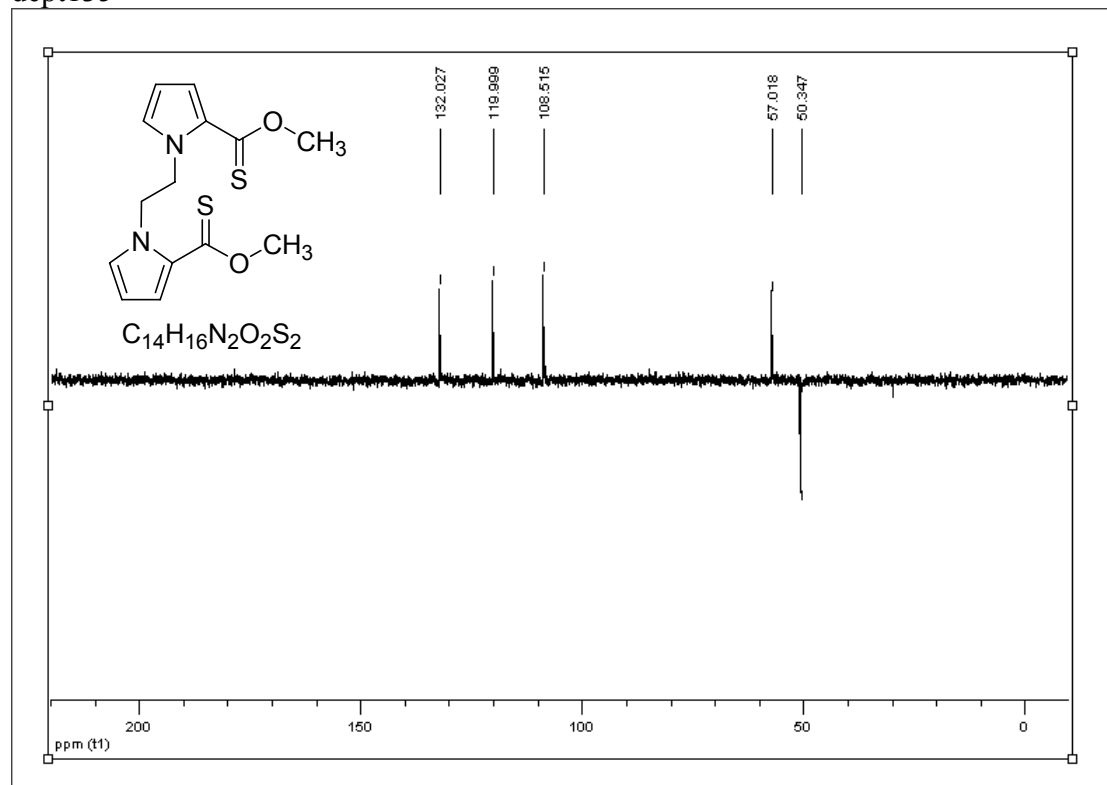

dept90

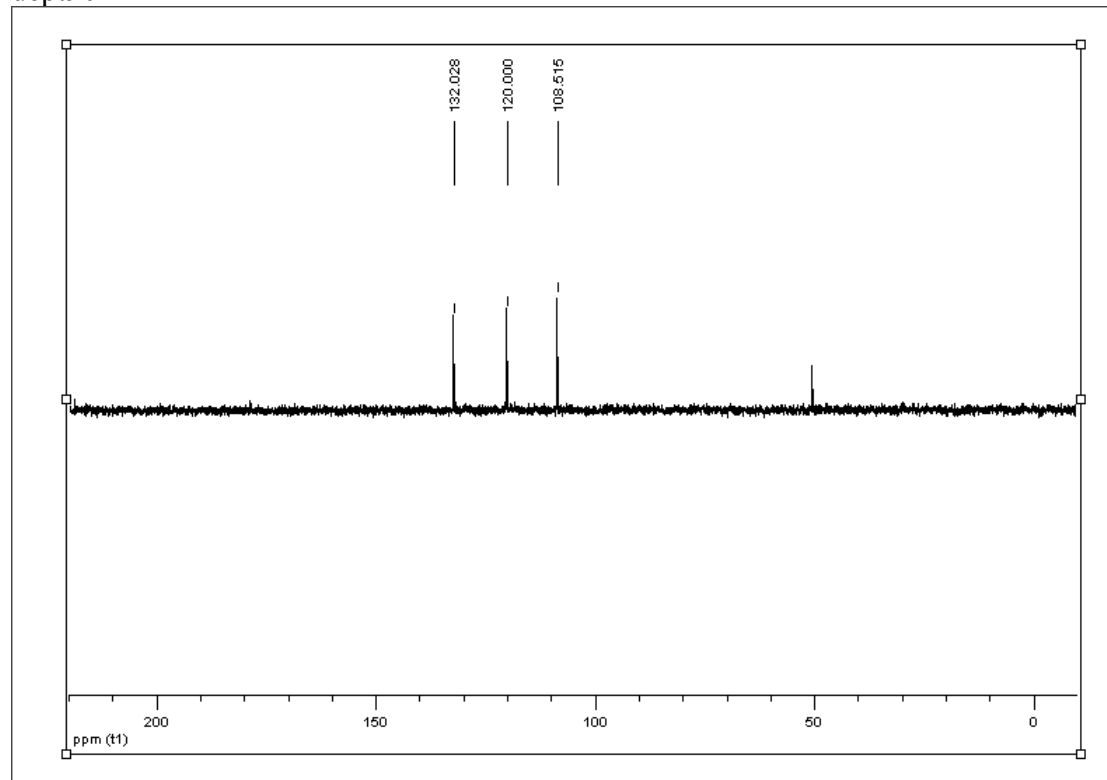

### Initial product from reaction of thiophosgene with 1,1-di(pyrrol-1-yl)methane

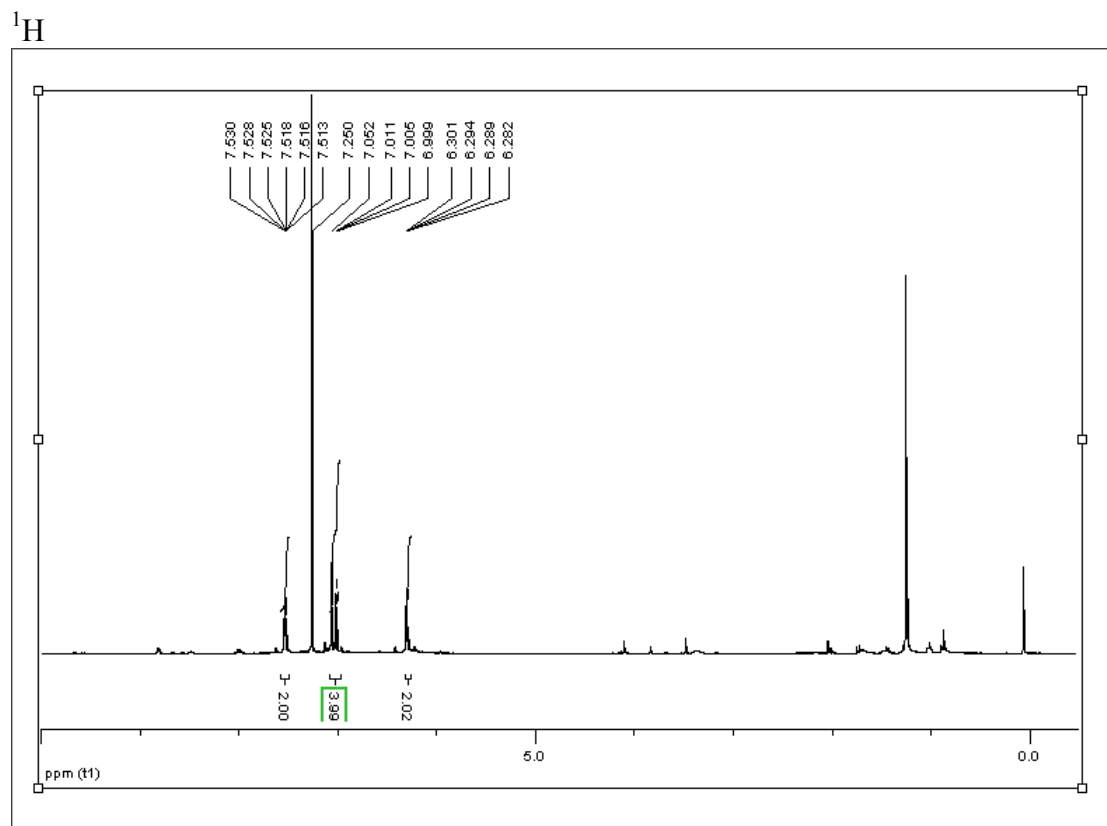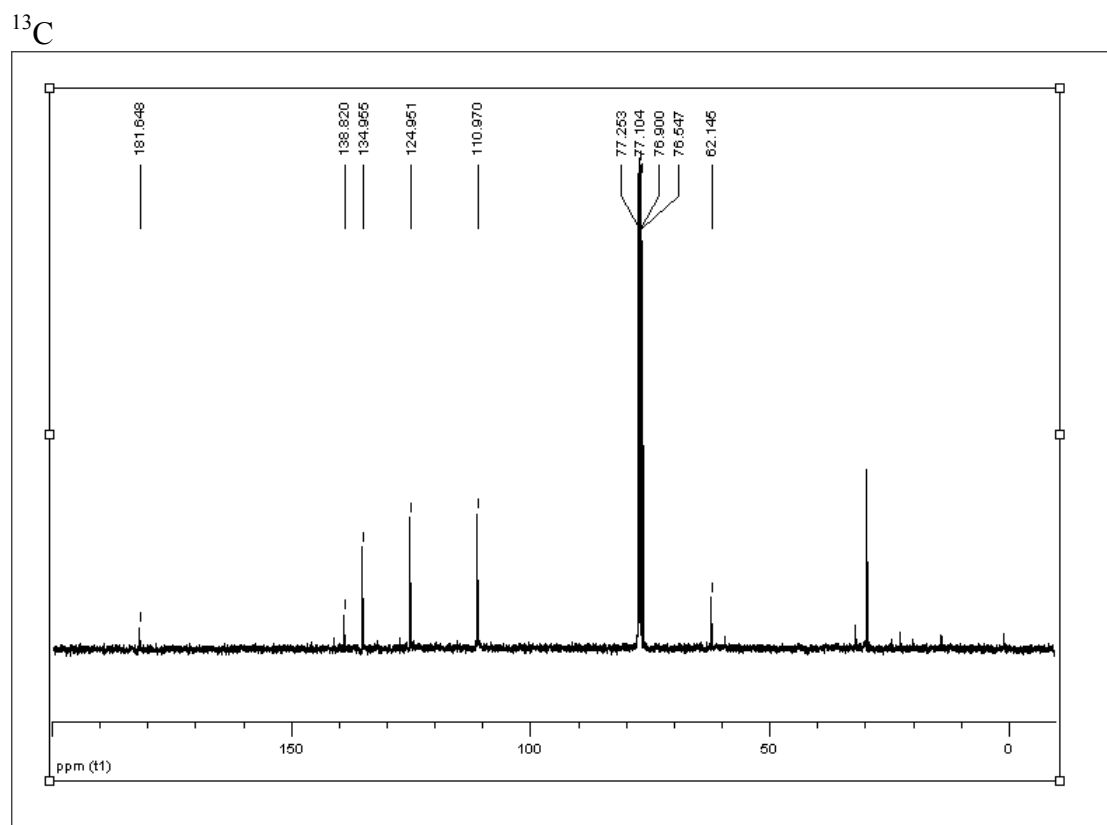



dept135

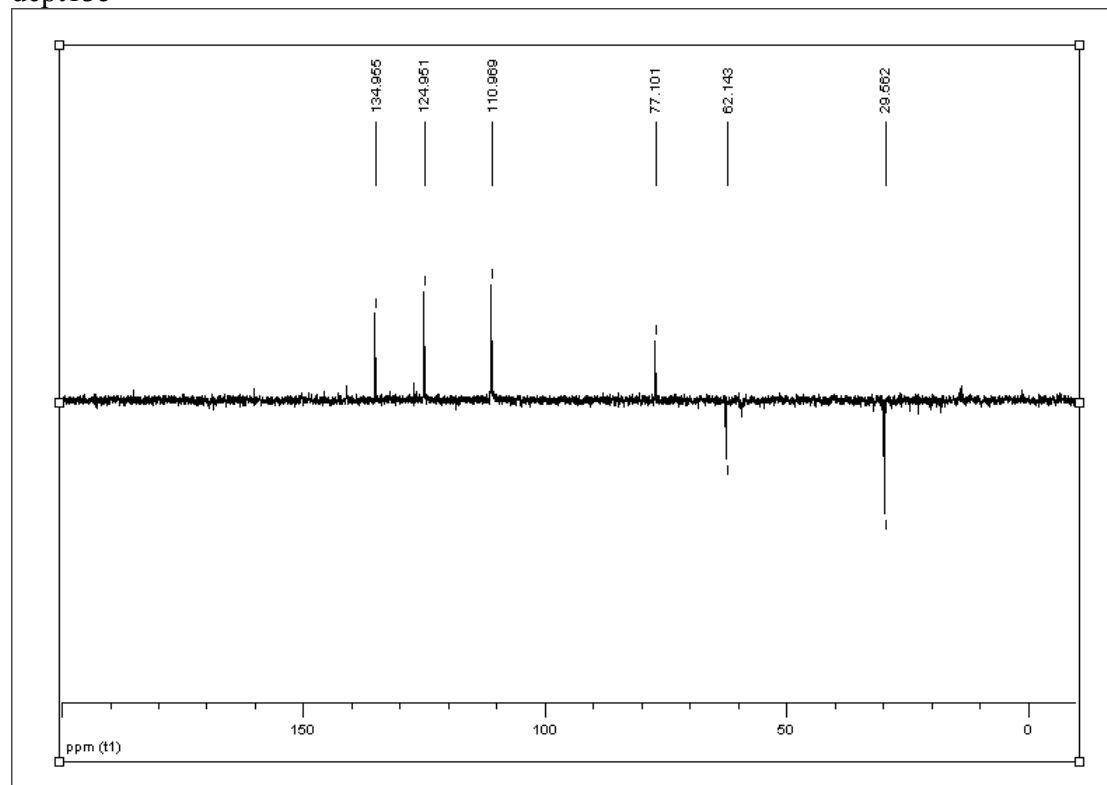

dept90

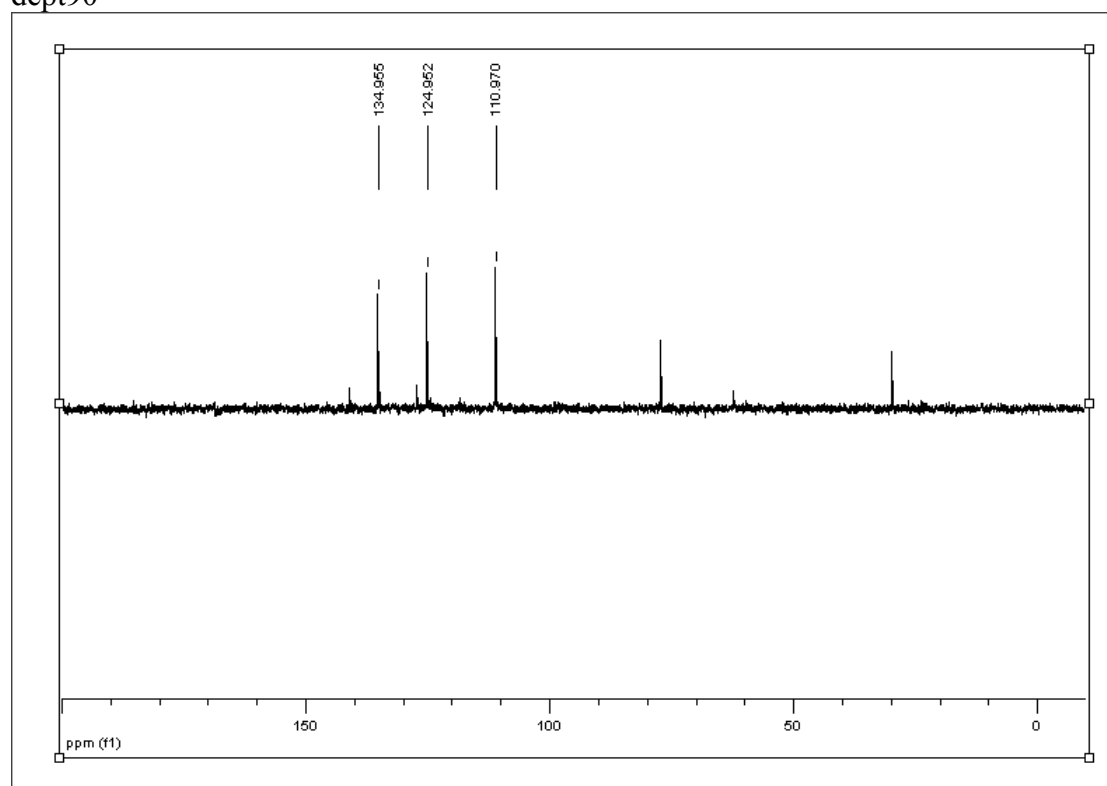

### 1,1-Di[2-(carbothiomethoxy)pyrrol-1-yl]methane 8

<sup>1</sup>H

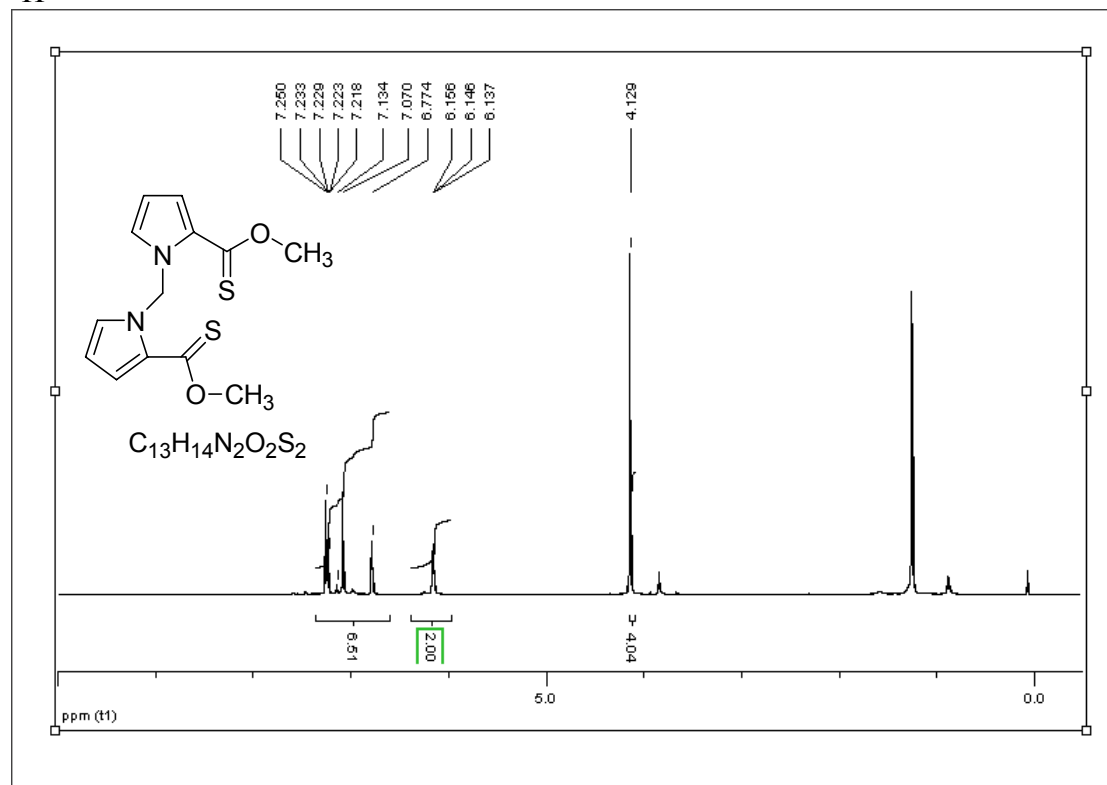

<sup>13</sup>C

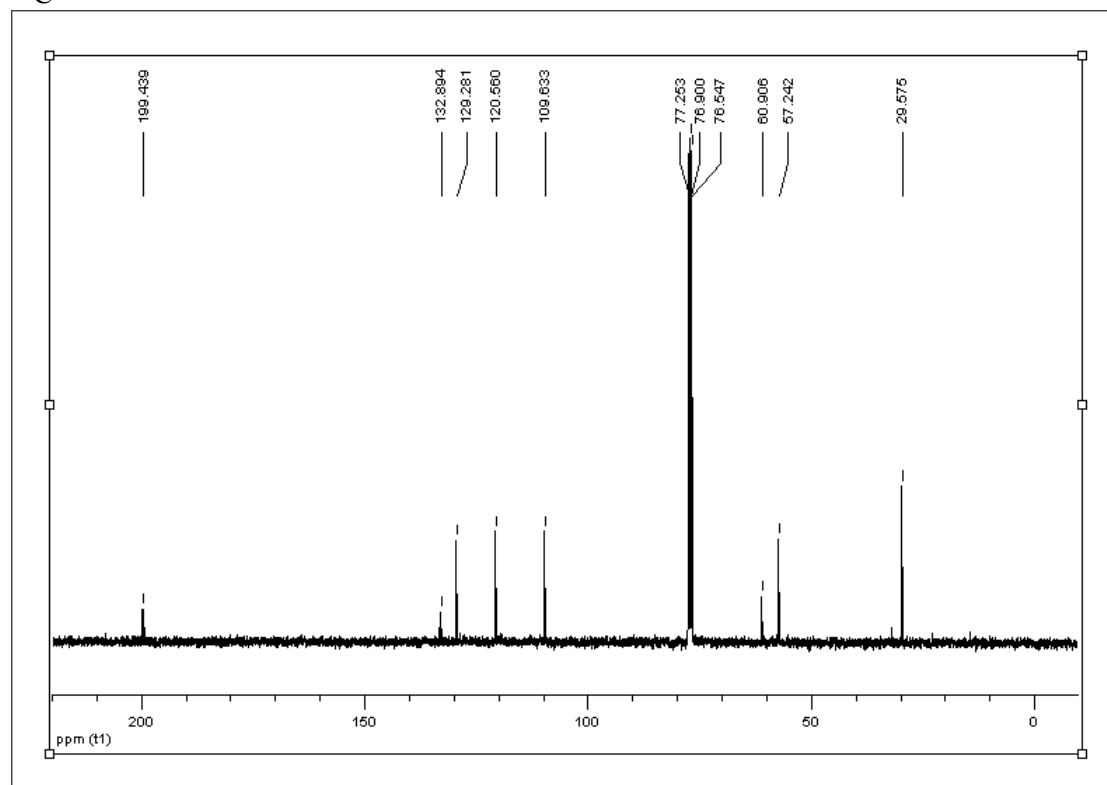

dept135

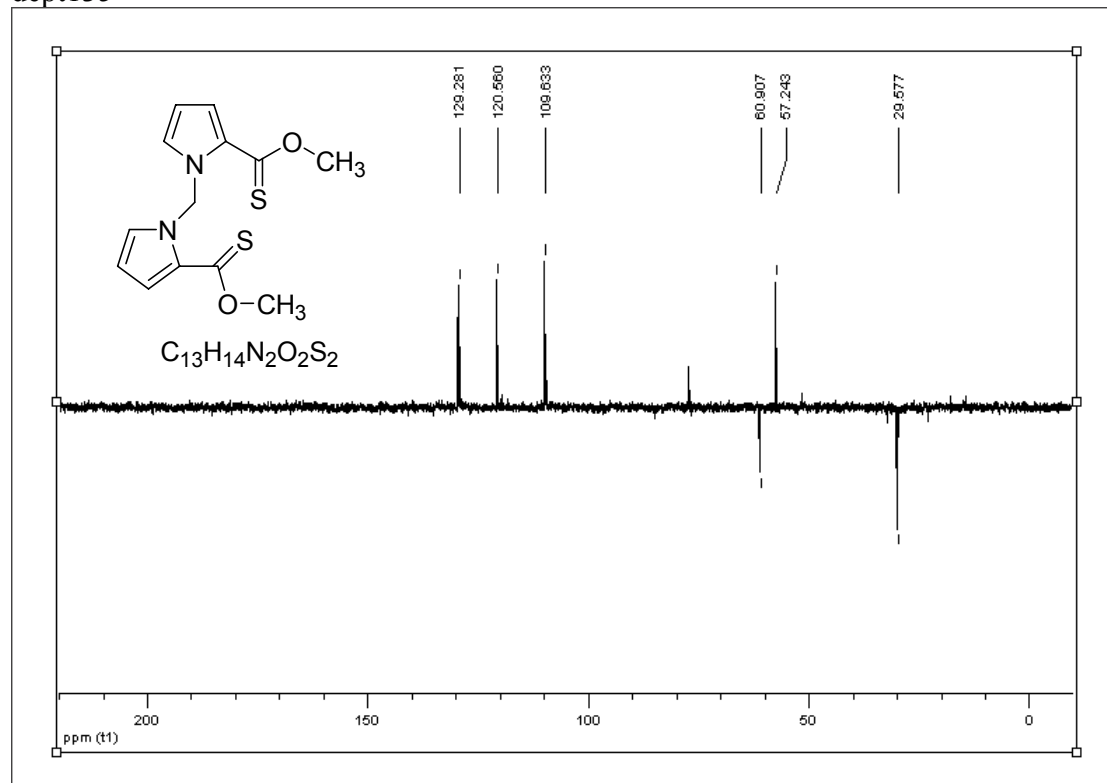

dept90

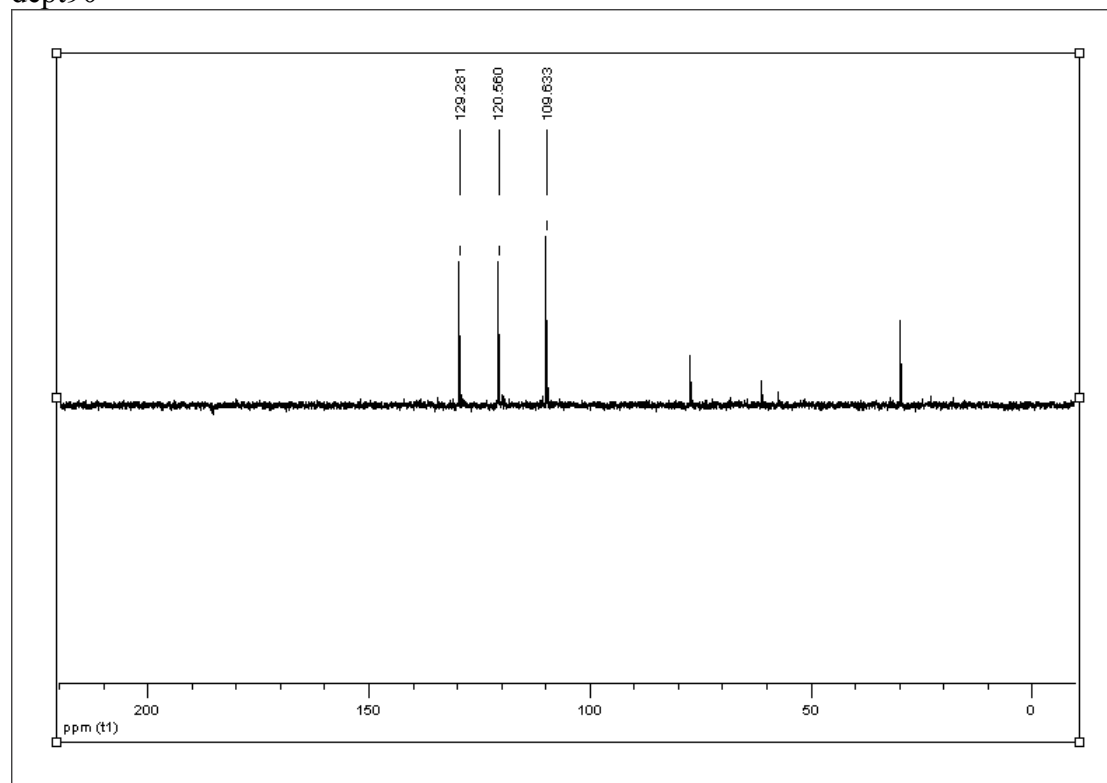

### 5,6-Dihydro-11*H*-dipyrrolo[1,2-*d*;2',1'-*g*][1,4]diazepine **9**

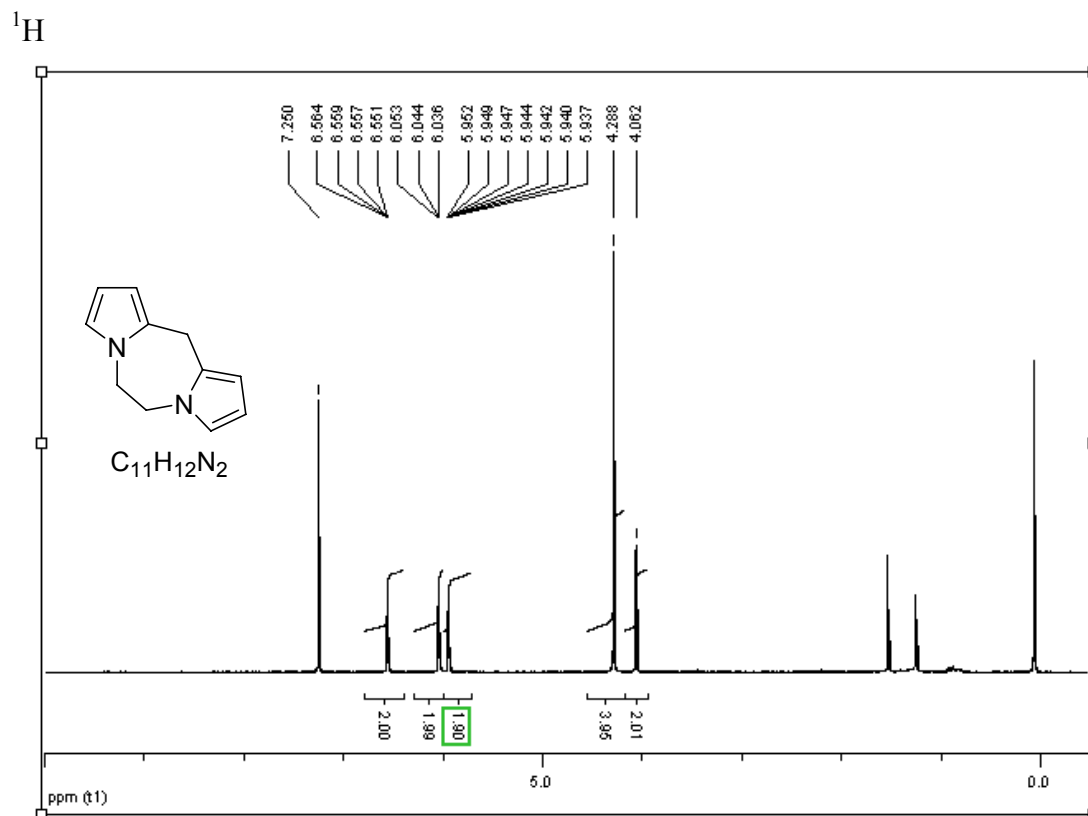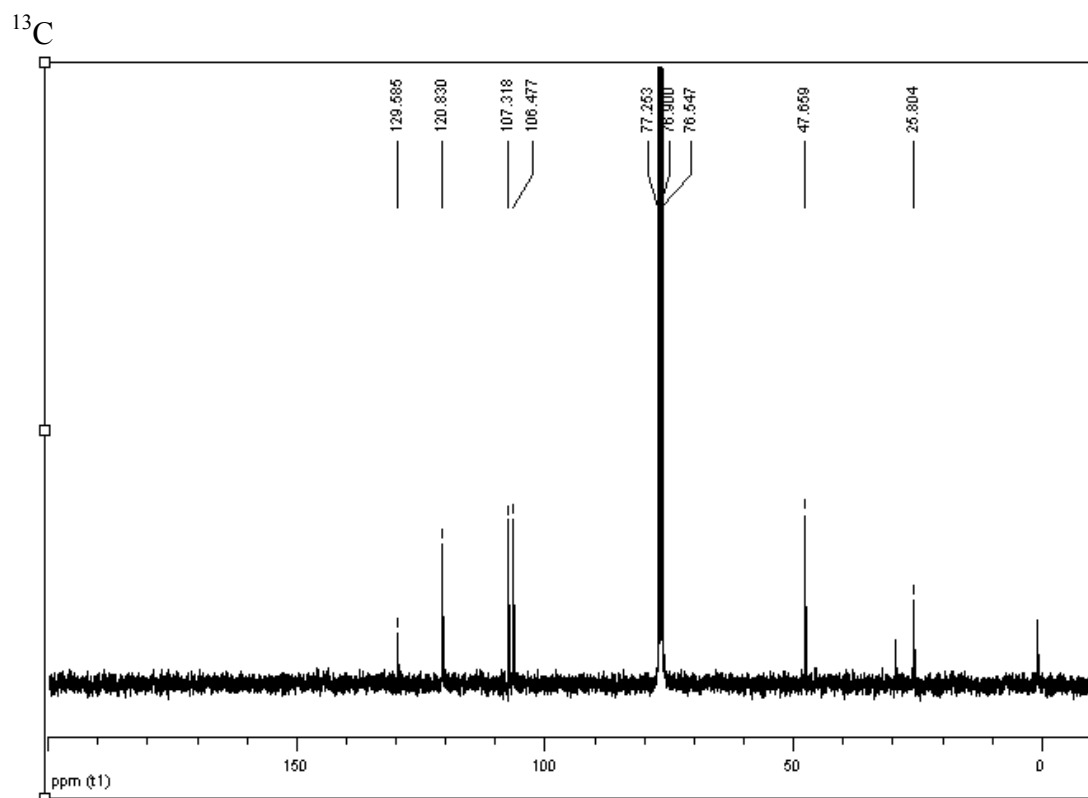

dept135

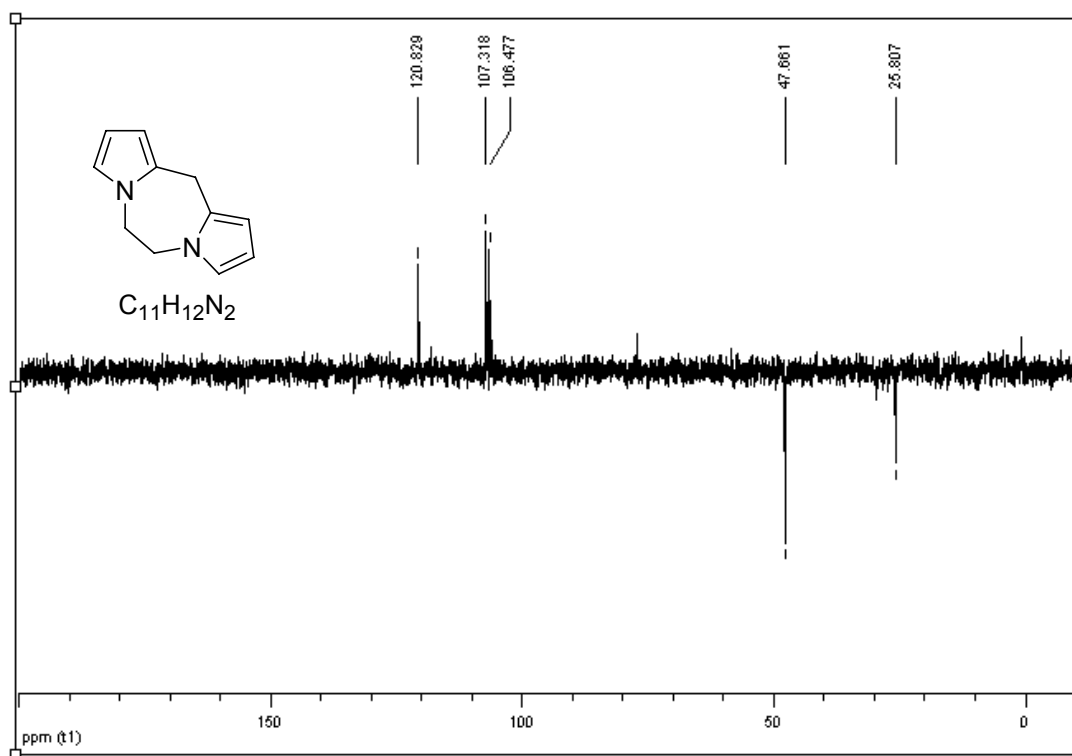

dept90

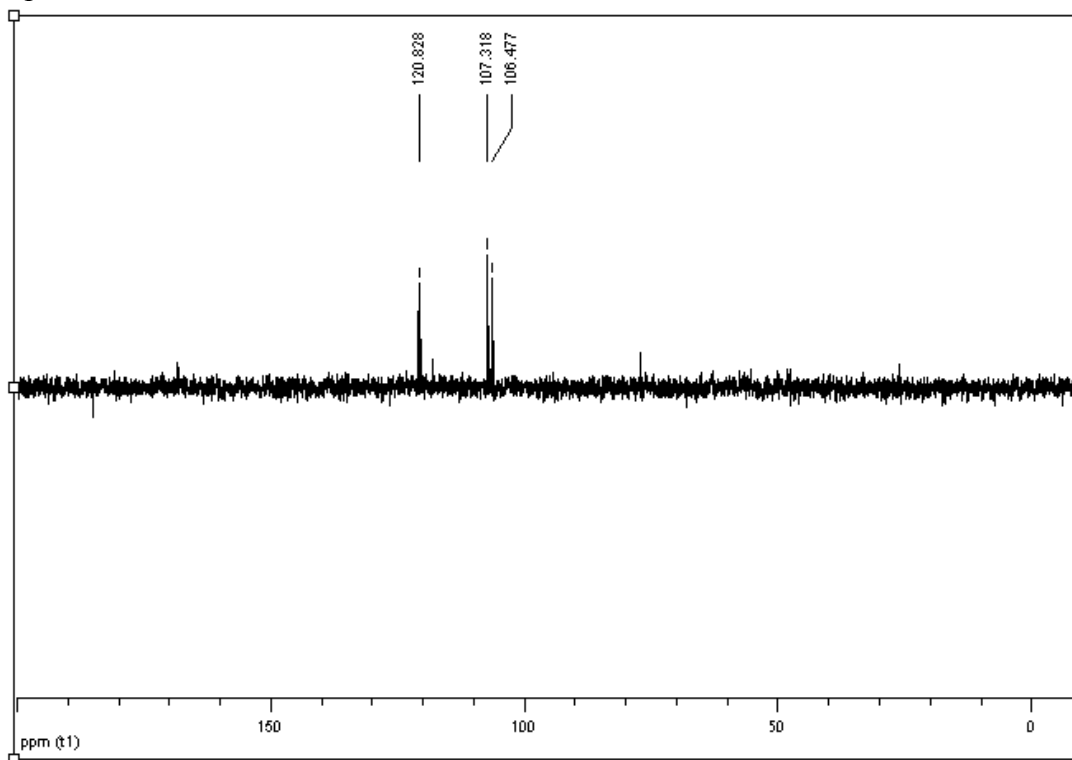

### 5,6-Dihydro-11*H*-dipyrrolo[1,2-*d*;2',1'-*g*][1,4]diazepine-3,8-dicarbaldehyde 10

<sup>1</sup>H

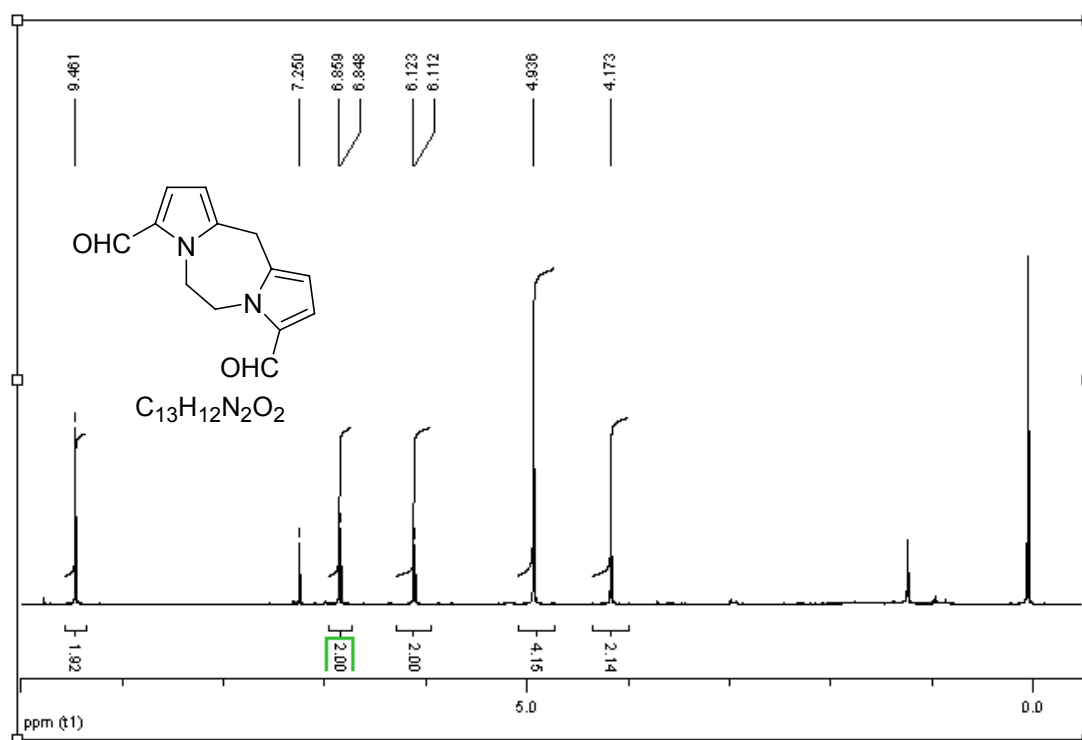

<sup>13</sup>C

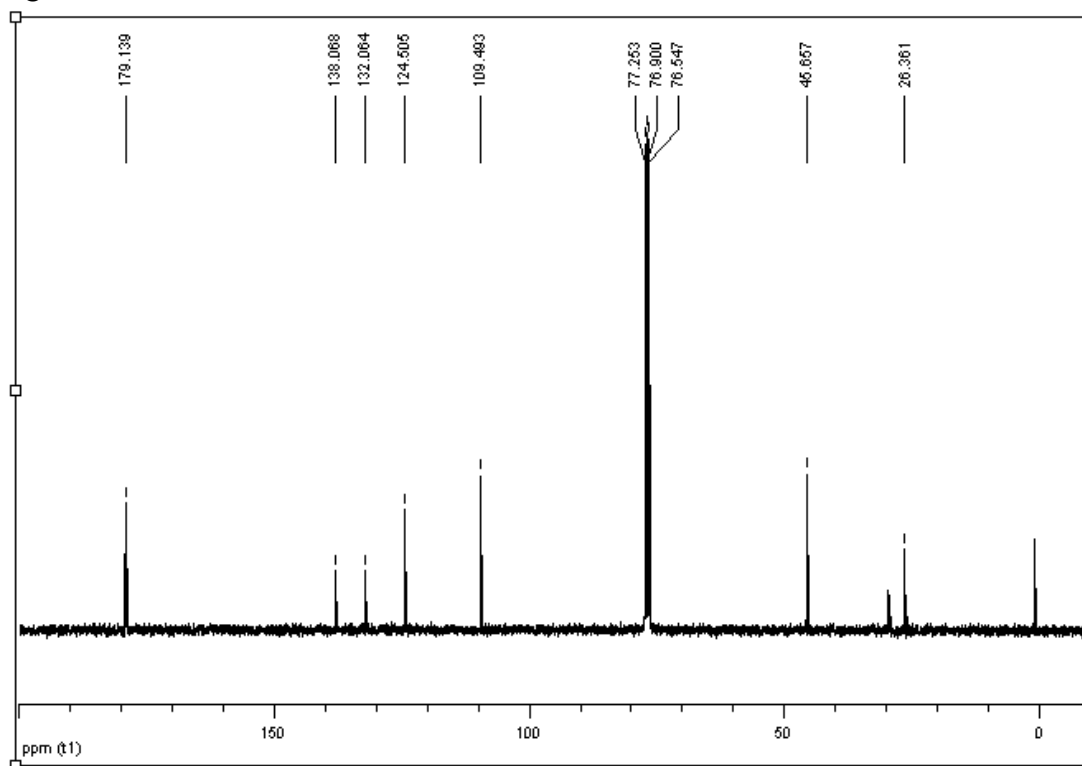

dept135

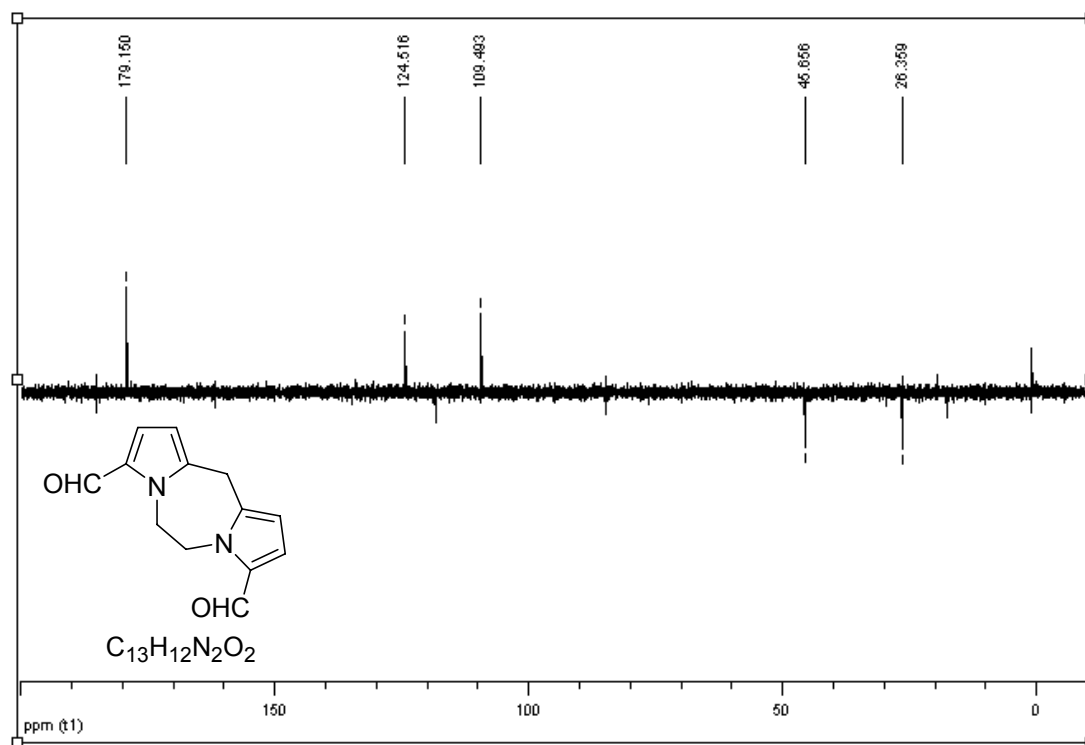

dept90

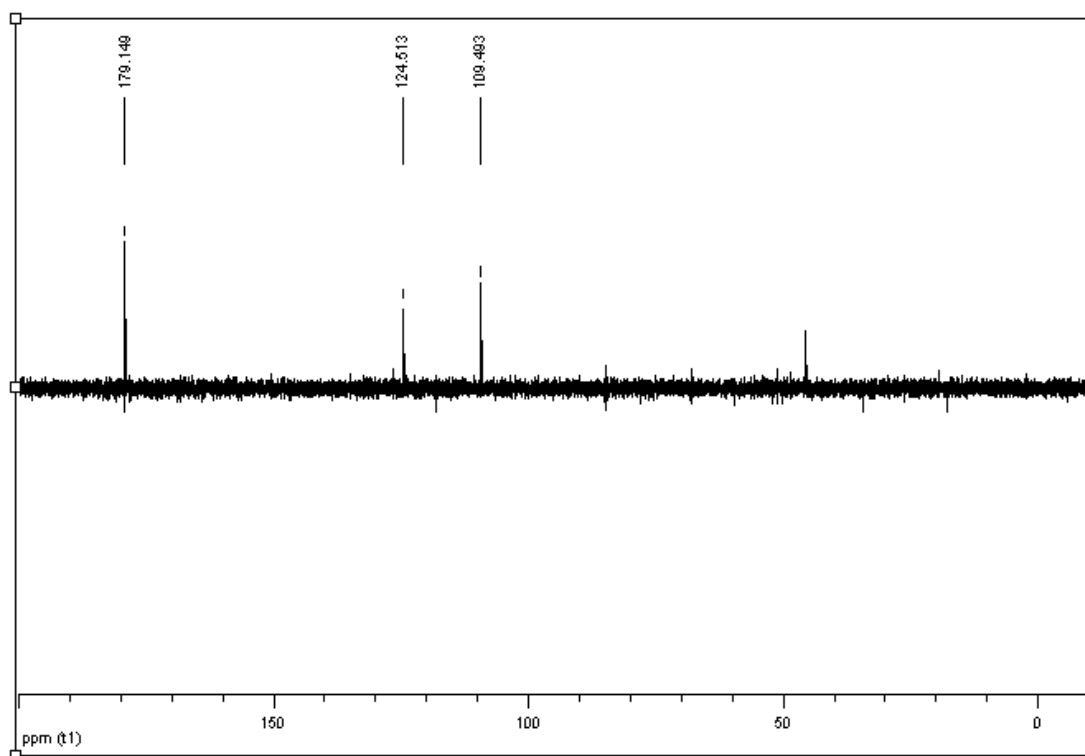

Supplement: b906802n.pdf [file b906802n.pdf]
